# Supplementary material for: Identification of GATA2-AS1- hsa-miR-125b-5p-PLAU ceRNA regulatory network as novel biomarkers for prethrombotic state in patients with coronary artery disease
Source: Research Square preprint supplement (doi:10.21203/rs.3.rs-7671890/v1), 2026-01-29
Supplement: Supplementary file 1 [file 03b463ea830bdf02545c207b.xlsx]

## Sheet: 253DElncRNA_expression
Supplementary Table 7. 253 candidate lncRNAs.
transcript_id	gene_id	gene_name	NPTSvsHEALTH log2FoldChange	NPTSvsHEALTH pvalue	NPTSvsHEALTH UP DOWN	PTSvsHEALTH log2FoldChange	PTSvsHEALTH pvalue	PTSvsHEALTH UP DOWN	AMIvsHEALTH log2FoldChange	AMIvsHEALTH pvalue	AMIvsHEALTH UP DOWN	PTSvsNPTS log2FoldChange	PTSvsNPTS pvalue	PTSvsNPTS UP DOWN	AMIvsPTS log2FoldChange	AMIvsPTS pvalue	AMIvsPTS UP DOWN
ENST00000555134	ENSG00000009830	POMT2	2.5929	0.479841	no	5.5663	0.00655652	up	5.14772	0.0118335	up	3.00559	0.111345	no	-0.433516	0.779658	no
TCONS_00002648	ENSG00000025800	KPNA6	-1.58181	0.532422	no	-6.77723	0.012138	down	-6.7895	0.011564	down	-5.2372	0.0684455	no	NA	NA	NA
ENST00000697093	ENSG00000026103	FAS	-0.428266	0.569203	no	2.09608	0.0407318	up	2.20792	0.0233946	up	2.53978	0.0150523	up	0.108987	0.929802	no
ENST00000603865	ENSG00000062282	DGAT2	0.667148	0.428488	no	1.60518	0.0334165	up	1.73846	0.028162	up	0.941717	0.202552	no	0.144907	0.840295	no
ENST00000685755	ENSG00000064313	TAF2	1.91799	0.355052	no	3.53869	0.0387046	up	4.27422	0.00297145	up	1.6239	0.351471	no	0.732313	0.593931	no
ENST00000587672	ENSG00000065717	TLE2	-1.04314	0.557824	no	-6.25713	0.00239935	down	-6.29083	0.00230477	down	-5.26567	0.0278734	down	NA	NA	NA
ENST00000403534	ENSG00000069399	BCL3	1.19025	0.0740954	no	1.59771	0.0149751	up	1.39611	0.027888	up	0.422874	0.508323	no	-0.196161	0.745915	no
ENST00000665338	ENSG00000069424	KCNAB2	0.174666	0.812489	no	-1.46438	0.023365	down	-1.33188	0.0473403	down	-1.63829	0.0154352	down	0.146764	0.799072	no
ENST00000675507	ENSG00000070061	ELP1	2.76567	0.211395	no	-5.7467	0.0049725	down	-5.08224	0.011795	down	-8.51216	0.00118508	down	0.686765	1	no
ENST00000581133	ENSG00000076382	SPAG5	1.8457	0.601976	no	5.14713	0.000961618	up	4.26227	0.0414562	up	3.34068	0.00838931	up	-0.909812	0.485714	no
ENST00000700270	ENSG00000080815	PSEN1	-2.51677	0.0729678	no	-3.60144	0.0121306	down	-3.07619	0.0449974	down	-1.0707	0.500457	no	0.550565	0.79498	no
ENST00000682248	ENSG00000081052	COL4A4	-0.990769	0.427143	no	-3.01878	0.0378549	down	-4.71425	0.00291113	down	-2.02655	0.19199	no	-1.6737	0.486208	no
ENST00000676432	ENSG00000087053	MTMR2	-1.09862	0.510226	no	-4.60454	0.010858	down	-4.33153	0.0106408	down	-3.48759	0.0503701	no	0.274315	1	no
ENST00000703366	ENSG00000087470	DNM1L	-1.72846	0.165876	no	-2.77604	0.0260322	down	-2.6383	0.0286768	down	-1.03152	0.472685	no	0.144115	1	no
ENST00000552455	ENSG00000089009	RPL6	1.23561	0.244115	no	4.44927	0.00013138	up	2.83366	0.0149662	up	3.21978	0.00206177	up	-1.60744	0.119781	no
ENST00000697890	ENSG00000094631	HDAC6	-3.76143	0.103339	no	-5.54511	0.0271826	down	-5.57664	0.0251642	down	-1.82556	0.720675	no	NA	NA	NA
TCONS_00131559	ENSG00000099308	MAST3	0.00534698	1	no	2.44118	0.017476	up	2.86742	0.0110086	up	2.43402	0.0183144	up	0.459063	0.703073	no
ENST00000489772	ENSG00000100083	GGA1	-0.24971	0.789367	no	2.98593	0.00504833	up	2.35809	0.0397126	up	3.23502	0.00313804	up	-0.62221	0.617341	no
TCONS_00178525	ENSG00000100354	TNRC6B	0.469283	0.752818	no	-6.09293	2.36743e-05	down	-5.54129	7.45e-05	down	-6.5736	1.00579e-05	down	0.560477	0.453119	no
TCONS_00178515	ENSG00000100354	TNRC6B	0.0517314	0.98581	no	-8.0654	0.00367076	down	-8.09746	0.00351577	down	-8.17703	0.00360983	down	NA	NA	NA
ENST00000553555	ENSG00000100823	APEX1	1.93834	0.0574025	no	2.86286	0.0014716	up	3.21475	0.000881761	up	0.923757	0.28083	no	0.347797	0.650758	no
ENST00000703124	ENSG00000102471	NDFIP2	-1.29952	0.097535	no	-1.86624	0.042479	down	-2.26435	0.00547378	down	-0.562859	0.56466	no	-0.381243	0.71577	no
ENST00000678817	ENSG00000103811	CTSH	1.80135	0.0579689	no	4.41154	0.00114604	up	3.17832	0.00550582	up	2.62039	0.0403742	up	-1.22512	0.353316	no
ENST00000489732	ENSG00000105835	NAMPT	0.742221	0.214423	no	1.29871	0.0195165	up	1.08825	0.0485408	up	0.565993	0.352954	no	-0.202392	0.718471	no
TCONS_00252203	ENSG00000106617	PRKAG2	-2.35934	0.346286	no	6.10398	0.000232387	up	5.50607	0.00092966	up	8.48065	3.12363e-05	up	-0.586803	0.710327	no
ENST00000478380	ENSG00000107099	DOCK8	-0.636193	0.58344	no	-2.26115	0.0119434	down	-2.50589	0.0069991	down	-1.61869	0.137135	no	-0.235005	0.772113	no
ENST00000580991	ENSG00000109083	IFT20	2.31089	0.560182	no	4.27438	0.0382237	up	5.00559	0.00441259	up	2.00221	0.308711	no	0.709649	0.587743	no
ENST00000481501	ENSG00000109113	RAB34	0.87071	0.307734	no	1.90945	0.0129001	up	1.58232	0.0336992	up	1.05229	0.148199	no	-0.320061	0.627043	no
ENST00000542751	ENSG00000111664	GNB3	-2.68291	0.24701	no	-4.93975	0.0475571	down	-4.95288	0.0461623	down	-2.29454	0.554025	no	NA	NA	NA
ENST00000475214	ENSG00000114054	PCCB	1.81591	0.726627	no	4.65846	0.0269162	up	5.15125	0.011386	up	2.87501	0.132704	no	0.469274	0.797556	no
ENST00000470070	ENSG00000114541	FRMD4B	-1.82425	0.405378	no	-6.28191	0.00690429	down	-6.31172	0.00661997	down	-4.51831	0.151498	no	NA	NA	NA
ENST00000461347	ENSG00000115053	NCL	0.725998	0.336392	no	3.16624	0.00508771	up	2.54258	0.0121925	up	2.44471	0.025638	up	-0.623163	0.598758	no
ENST00000586074	ENSG00000115257	PCSK4	0.74957	0.404954	no	-2.21825	0.0375975	down	-2.2835	0.0271696	down	-2.96203	0.0180102	down	-0.0666362	1	no
ENST00000463191	ENSG00000116016	EPAS1	3.67583	0.0630876	no	4.00193	0.0305945	up	4.11112	0.00472894	up	0.351229	0.854871	no	0.104009	0.968272	no
ENST00000679880	ENSG00000116337	AMPD2	4.63488	0.13178	no	6.20922	0.0232205	up	7.81625	0.00103845	up	1.61084	0.523118	no	1.60544	0.476556	no
ENST00000528958	ENSG00000116337	AMPD2	-0.561428	0.428517	no	1.95355	0.0184656	up	2.86926	0.00247828	up	2.52796	0.00376696	up	0.945723	0.339245	no
ENST00000647657	ENSG00000117139	KDM5B	-0.52843	0.638184	no	-2.74864	0.0104204	down	-2.5392	0.0151845	down	-2.21345	0.0175142	down	0.223014	0.807943	no
TCONS_00153060	ENSG00000118260	CREB1	-0.134446	0.962628	no	-9.23579	0.00157716	down	-9.26291	0.00152135	down	-9.13607	0.00192367	down	NA	NA	NA
ENST00000679760	ENSG00000120697	ALG5	-0.0984949	0.951919	no	-3.83749	0.0063325	down	-3.12715	0.0283289	down	-3.75411	0.022159	down	0.720298	0.803993	no
ENST00000532078	ENSG00000121690	DEPDC7	-1.36263	0.0858554	no	-2.04336	0.0321757	down	-2.35344	0.00692984	down	-0.673616	0.603367	no	-0.303509	0.891921	no
ENST00000680904	ENSG00000123607	TTC21B	-1.14674	0.210731	no	-2.29504	0.0143	down	-2.21507	0.0284039	down	-1.14787	0.263684	no	0.0899952	1	no
TCONS_00225117	ENSG00000124588	NQO2	1.82716	0.472132	no	-7.06957	0.00466765	down	-7.10143	0.0044909	down	-8.9448	0.00214496	down	NA	NA	NA
TCONS_00104756	ENSG00000125107	CNOT1	-0.516429	0.858793	no	-9.95633	0.00107779	down	-9.98347	0.00103786	down	-9.47857	0.0015976	down	NA	NA	NA
TCONS_00104749	ENSG00000125107	CNOT1	0.127351	0.959239	no	-6.95936	0.00996768	down	-6.97161	0.00954417	down	-7.11253	0.00299835	down	NA	NA	NA
ENST00000667036	ENSG00000125462	MIR9-1HG	-1.45288	0.291777	no	-4.31153	0.00545205	down	-4.33868	0.00552523	down	-2.89767	0.258695	no	NA	NA	NA
ENST00000594936	ENSG00000125730	C3	2.88013	0.264026	no	4.41166	0.0375785	up	4.37604	0.0148828	up	1.57397	0.3778	no	-0.0583285	1	no
ENST00000557958	ENSG00000130164	LDLR	1.16811	0.0740159	no	2.1131	0.000856538	up	1.21176	0.0433624	up	0.951727	0.155276	no	-0.892584	0.150406	no
ENST00000409694	ENSG00000131018	SYNE1	1.27994	0.128862	no	1.6869	0.0171387	up	1.56476	0.0363758	up	0.416552	0.558756	no	-0.11785	0.84141	no
TCONS_00107185	ENSG00000132359	RAP1GAP2	-2.89931	0.293567	no	-9.15288	0.00172486	down	-9.16932	0.00165909	down	-6.27493	0.0227516	down	NA	NA	NA
ENST00000416574	ENSG00000132471	WBP2	0.976546	0.631943	no	-5.11213	0.0351927	down	-5.13589	0.0322452	down	-6.12861	0.00912077	down	NA	NA	NA
ENST00000683845	ENSG00000132932	ATP8A2	-2.10903	0.155514	no	-4.74323	0.00450092	down	-4.76796	0.00379972	down	-2.69068	0.468516	no	NA	NA	NA
ENST00000677935	ENSG00000135047	CTSL	1.82411	0.405821	no	3.20756	0.011755	up	3.34437	0.0124085	up	1.4091	0.261723	no	0.145702	0.868292	no
ENST00000490894	ENSG00000136603	SKIL	0.961502	0.126377	no	1.39781	0.0377479	up	1.35463	0.0476635	up	0.446514	0.489639	no	-0.0402211	0.95907	no
TCONS_00270069	ENSG00000137075	RNF38	-3.0188	0.264568	no	-8.8146	0.00212981	down	-7.61144	0.00455977	down	-5.8061	0.0388113	down	NA	NA	NA
ENST00000684085	ENSG00000138081	FBXO11	-0.254957	1	no	4.44742	0.000278954	up	5.33378	0.000723299	up	4.71451	0.000188102	up	0.92135	0.535121	no
ENST00000683645	ENSG00000138095	LRPPRC	-1.65134	0.0515316	no	-2.28435	0.00900635	down	-1.92418	0.02281	down	-0.635601	0.350331	no	0.371738	0.583556	no
ENST00000507947	ENSG00000138757	G3BP2	0.309124	0.751462	no	3.82908	0.000569736	up	3.89766	0.000190713	up	3.53654	0.00114734	up	0.0769276	0.946865	no
ENST00000505328	ENSG00000138795	LEF1	-0.919638	0.161344	no	-1.40535	0.0381265	down	-1.34381	0.0484909	down	-0.481647	0.468657	no	0.0733859	0.921335	no
TCONS_00078352	ENSG00000140153	WDR20	0.405385	0.886018	no	-8.75389	0.00213763	down	-8.781	0.00203994	down	-9.19791	0.00186385	down	NA	NA	NA
ENST00000564068	ENSG00000140365	COMMD4	1.82672	0.0585459	no	1.99474	0.0258598	up	2.22322	0.00809233	up	0.175119	0.837811	no	0.232734	0.742281	no
ENST00000681897	ENSG00000141252	VPS53	-1.42504	0.104675	no	-2.29634	0.00436598	down	-1.81739	0.0226022	down	-0.87057	0.24277	no	0.494508	0.428103	no
ENST00000486901	ENSG00000142798	HSPG2	0.445155	0.822476	no	-6.00809	0.0131423	down	-6.04716	0.0121749	down	-6.50619	0.00382472	down	NA	NA	NA
ENST00000677529	ENSG00000143801	PSEN2	1.12728	0.592905	no	-5.02199	0.0201402	down	-5.04316	0.0195414	down	-6.18155	0.02489	down	NA	NA	NA
ENST00000569377	ENSG00000153786	ZDHHC7	0.598374	0.481661	no	2.01612	0.00631675	up	2.28023	0.00765397	up	1.42594	0.0781771	no	0.283467	0.717769	no
ENST00000664862	ENSG00000154358	OBSCN	-0.840668	0.328636	no	-2.37653	0.00246412	down	-1.70417	0.0194328	down	-1.53076	0.117654	no	0.684237	0.404158	no
TCONS_00102834	ENSG00000155719	OTOA	-4.59379	0.102271	no	-5.29446	0.0452166	down	-13.2597	5.5e-05	down	-0.658708	0.749211	no	-7.98693	0.000426318	down
ENST00000560952	ENSG00000157450	RNF111	-0.416511	0.7236	no	-3.38129	0.00118763	down	-3.6594	0.000529041	down	-2.94921	0.00474552	down	-0.277991	0.679666	no
ENST00000678068	ENSG00000158864	NDUFS2	1.17737	0.131153	no	1.74154	0.0181244	up	1.84939	0.0177885	up	0.568073	0.428851	no	0.117276	0.87499	no
ENST00000512888	ENSG00000159674	SPON2	-0.722391	0.31324	no	-1.5694	0.0305137	down	-1.59697	0.0341651	down	-0.828454	0.181065	no	-0.0209323	0.978049	no
TCONS_00206134	ENSG00000159674	SPON2	-1.45939	0.40067	no	-4.66822	0.0145141	down	-5.39726	0.0115343	down	-3.20467	0.120261	no	-0.694838	0.758683	no
ENST00000495308	ENSG00000160752	FDPS	0.780007	0.340746	no	2.25697	0.01343	up	2.14209	0.025247	up	1.48728	0.0725867	no	-0.10164	0.932062	no
ENST00000582848	ENSG00000161960	EIF4A1	3.65608	0.0762323	no	5.8408	0.00473527	up	7.05666	0.00376943	up	2.22213	0.153339	no	1.18444	0.520051	no
ENST00000581841	ENSG00000161960	EIF4A1	0.159181	0.800141	no	1.37512	0.0305298	up	1.36966	0.0306471	up	1.22516	0.0600551	no	-0.00250851	1	no
ENST00000583515	ENSG00000161970	RPL26	-0.71879	0.396802	no	-1.57056	0.0395147	down	-2.64795	0.00128572	down	-0.839982	0.226152	no	-1.07227	0.072774	no
ENST00000696820	ENSG00000163702	IL17RC	1.81591	0.726571	no	5.79908	0.018798	up	6.61118	0.000425686	up	4.01765	0.0763989	no	0.789007	0.640026	no
ENST00000492183	ENSG00000163738	MTHFD2L	-0.117688	0.860031	no	-1.31597	0.0454713	down	-1.33673	0.0431422	down	-1.18908	0.0953562	no	-0.00456954	1	no
ENST00000492196	ENSG00000163798	SLC4A1AP	-1.17396	0.158995	no	-2.86019	0.000539914	down	-4.01562	4.11e-06	down	-1.68098	0.0277712	down	-1.14416	0.118109	no
ENST00000474664	ENSG00000164031	DNAJB14	-1.59052	0.176225	no	-2.4288	0.0310544	down	-3.44598	0.00314129	down	-0.831391	0.517296	no	-0.992869	0.362639	no
ENST00000612499	ENSG00000165949	IFI27	1.26454	0.118049	no	1.79967	0.0370467	up	2.17712	0.0413858	up	0.545835	0.482498	no	0.381733	0.70607	no
ENST00000532305	ENSG00000166478	ZNF143	-0.889482	0.219109	no	2.25981	0.0131999	up	1.93074	0.031119	up	3.15591	0.000607505	up	-0.333493	0.734847	no
TCONS_00106815	ENSG00000167522	ANKRD11	0.434697	0.848514	no	-8.28703	0.000637629	down	-7.14615	0.00160197	down	-8.773	0.0011592	down	NA	NA	NA
TCONS_00086478	ENSG00000169032	MAP2K1	-1.75601	0.538322	no	-12.6024	3.78983e-05	down	-12.6277	3.69e-05	down	-10.8934	0.000786878	down	NA	NA	NA
ENST00000521628	ENSG00000169139	UBE2V2	-1.2125	0.174226	no	-2.57161	0.000894239	down	-2.48237	0.00286539	down	-1.34539	0.122197	no	0.091568	0.911667	no
ENST00000566640	ENSG00000169375	SIN3A	-0.182435	0.830748	no	2.37922	0.0162766	up	2.34207	0.0145299	up	2.56623	0.0111687	up	-0.0322193	0.981342	no
ENST00000581490	ENSG00000170298	LGALS9B	-0.463794	0.587062	no	-1.97632	0.0295846	down	-2.57082	0.0107325	down	-1.51078	0.0562665	no	-0.583125	0.617022	no
TCONS_00262424	ENSG00000170873	MTSS1	-1.11461	0.632021	no	-9.38427	1.98786e-05	down	-12.6487	6.1e-08	down	-8.23662	0.0101772	down	-3.28414	0.316175	no
ENST00000695848	ENSG00000171316	CHD7	4.8273	0.0568598	no	5.69947	0.0028499	up	4.47878	0.0363478	up	0.899815	0.668628	no	-1.22192	0.503788	no
ENST00000660442	ENSG00000172965	MIR4435-2HG	4.6564	0.132387	no	4.71186	0.0384685	up	4.661	0.0131475	up	0.0827644	0.971373	no	-0.0801878	1	no
ENST00000674092	ENSG00000172965	MIR4435-2HG	-1.10246	0.52694	no	-4.72389	0.0284174	down	-4.78029	0.0267867	down	-3.61511	0.0513167	no	-0.0492064	1	no
ENST00000666144	ENSG00000172965	MIR4435-2HG	0.925216	0.616067	no	-6.80219	0.00405713	down	-5.01823	0.0213124	down	-7.77035	0.000250589	down	1.79484	0.719699	no
ENST00000498674	ENSG00000173757	STAT5B	-1.14717	0.19437	no	-2.54457	0.0104883	down	-2.44875	0.0148581	down	-1.39866	0.0640703	no	0.124495	0.914499	no
ENST00000481517	ENSG00000173757	STAT5B	-0.0537105	1	no	2.3409	0.00959472	up	3.45269	0.00190318	up	2.40719	0.00873743	up	1.11794	0.331635	no
ENST00000517432	ENSG00000175048	ZDHHC14	-1.94691	0.0574569	no	-2.01236	0.0291631	down	-1.85441	0.00819702	down	-0.052151	0.971603	no	0.166811	0.850221	no
ENST00000477226	ENSG00000175084	DES	4.66653	0.062679	no	4.76624	0.0197653	up	5.66672	0.0169022	up	0.137544	0.964449	no	0.879841	0.610796	no
ENST00000533413	ENSG00000175216	CKAP5	-0.820473	0.29029	no	-1.529	0.0316737	down	-1.24195	0.0474451	down	-0.70932	0.390836	no	0.295845	0.667206	no
ENST00000683407	ENSG00000175595	ERCC4	1.37474	0.199541	no	2.82903	0.0172129	up	4.26737	0.000549245	up	1.46169	0.234643	no	1.44261	0.266328	no
ENST00000691767	ENSG00000175611	ERCC6L2-AS1	4.97989	0.0943061	no	5.49353	0.00642373	up	6.19888	0.00849213	up	0.553878	0.791677	no	0.705962	0.687662	no
ENST00000561223	ENSG00000175746	LINC02915	4.69713	0.0565534	no	5.49014	0.00795568	up	4.85195	0.0496827	up	0.831133	0.648133	no	-0.662569	0.710922	no
TCONS_00198803	ENSG00000177565	TBL1XR1	-0.362394	0.899883	no	-6.09084	0.0484727	down	-9.52629	0.0022379	down	-5.71172	0.0444184	down	-3.42442	0.195488	no
ENST00000491610	ENSG00000178035	IMPDH2	-1.4591	0.172862	no	-2.87694	0.0038828	down	-2.18671	0.0176526	down	-1.39822	0.236746	no	0.703546	0.493752	no
ENST00000686517	ENSG00000179818	PCBP1-AS1	1.23637	0.503239	no	-5.85812	0.0125631	down	-5.87884	0.012244	down	-7.13111	0.00103652	down	NA	NA	NA
ENST00000670786	ENSG00000179818	PCBP1-AS1	0.532174	0.794532	no	4.24841	0.0174042	up	5.19257	0.00293036	up	3.73412	0.0267273	up	0.951002	0.569451	no
ENST00000636831	ENSG00000182389	CACNB4	-1.01183	0.661266	no	-6.02072	0.028747	down	-6.05222	0.0271462	down	-5.0536	0.0401271	down	NA	NA	NA
ENST00000577000	ENSG00000185168	LINC00482	3.51651	0.103579	no	5.00175	0.00492519	up	5.68645	0.00107141	up	1.52041	0.270587	no	0.672956	0.574812	no
TCONS_00085513	ENSG00000185880	TRIM69	-0.154469	0.929377	no	-3.10211	0.0294363	down	-3.73305	0.00928522	down	-2.94858	0.0253957	down	-0.615664	0.452949	no
TCONS_00073294	ENSG00000185989	RASA3	1.14323	0.658287	no	-9.3567	0.00147275	down	-9.39894	0.00140263	down	-10.5605	0.000125986	down	NA	NA	NA
ENST00000570416	ENSG00000186594	MIR22HG	4.71872	0.055971	no	5.93614	0.00111727	up	5.4258	0.0229771	up	1.2587	0.409148	no	-0.53732	0.751724	no
ENST00000592135	ENSG00000188825	LINC00910	3.90457	0.137212	no	7.10946	0.000609226	up	7.72415	7.09e-05	up	3.25253	0.0562378	no	0.596087	0.69847	no
ENST00000684594	ENSG00000196305	IARS1	0.514198	0.82663	no	-5.38867	0.0335681	down	-6.60266	0.0149612	down	-5.93324	0.00583259	down	NA	NA	NA
ENST00000479701	ENSG00000196576	PLXNB2	1.13398	0.301974	no	-1.81585	0.0181877	down	-2.06207	0.0193947	down	-2.94859	0.00788717	down	-0.231119	0.775891	no
ENST00000696039	ENSG00000196839	ADA	-0.621234	0.786865	no	-7.04477	0.00241183	down	-7.07374	0.00229486	down	-6.46468	0.0181767	down	NA	NA	NA
ENST00000530298	ENSG00000198400	NTRK1	2.30619	0.0629312	no	3.53666	0.0112734	up	3.82006	0.0343374	up	1.23918	0.302624	no	0.278045	0.870966	no
ENST00000602886	ENSG00000198690	FAN1	-2.72073	0.163667	no	-7.86274	0.000121876	down	-7.89312	0.000119107	down	-5.18798	0.0718802	no	NA	NA	NA
ENST00000671822	ENSG00000198707	CEP290	0.123478	0.92094	no	-3.14281	0.0245027	down	-2.40524	0.0412302	down	-3.27443	0.00826138	down	0.753794	0.549442	no
ENST00000450439	ENSG00000203710	CR1	-1.17542	0.706664	no	6.15925	0.00254282	up	6.10888	0.00182881	up	7.35529	0.00152708	up	-0.0186954	0.995897	no
ENST00000653970	ENSG00000203999	LINC01270	2.26706	0.0900346	no	2.53819	0.0259367	up	2.58107	0.00475712	up	0.275209	0.819391	no	0.0551022	0.981008	no
ENST00000663299	ENSG00000205181	LINC00654	-0.202591	0.943919	no	-4.13069	0.0486938	down	-4.15584	0.0423107	down	-3.96941	0.122887	no	NA	NA	NA
ENST00000481221	ENSG00000206573	THUMPD3-AS1	4.03211	0.0578158	no	4.6984	0.0284104	up	4.90408	0.0314557	up	0.661787	0.720174	no	0.212856	0.911075	no
ENST00000539278	ENSG00000214248	ENSG00000214248	-1.08002	0.15169	no	-1.7547	0.0271587	down	-1.82303	0.0172127	down	-0.667298	0.402157	no	-0.0592045	0.974254	no
ENST00000571010	ENSG00000215067	ALOX12-AS1	-0.167041	0.917157	no	-3.22688	0.0355717	down	-3.00539	0.0261942	down	-3.05669	0.0529753	no	0.228365	1	no
ENST00000656761	ENSG00000215256	DHRS4-AS1	0.149766	0.896174	no	-3.21209	0.00190485	down	-2.67316	0.00837147	down	-3.34631	0.000965802	down	0.538343	0.468039	no
ENST00000532531	ENSG00000215440	NPEPL1	-1.55345	0.240771	no	-3.93403	0.00131976	down	-4.12571	0.00195721	down	-2.38483	0.221085	no	-0.158005	1	no
ENST00000594921	ENSG00000223642	ENSG00000223642	2.31089	0.560227	no	4.51165	0.0117533	up	4.54027	0.0347453	up	2.24421	0.16442	no	0.019538	1	no
ENST00000670642	ENSG00000224043	CCNT2-AS1	-0.968362	0.435624	no	-3.27705	0.017477	down	-2.70868	0.0258804	down	-2.31416	0.230372	no	0.585218	0.857552	no
ENST00000433446	ENSG00000224046	DMTF1-AS1	-1.82103	0.381148	no	-4.39994	0.0331726	down	-4.42887	0.0329494	down	-2.6143	0.471427	no	NA	NA	NA
ENST00000651466	ENSG00000224397	PELATON	2.89125	0.177603	no	4.67239	0.00820287	up	4.83543	0.00872837	up	1.82341	0.172576	no	0.141394	0.951829	no
ENST00000647895	ENSG00000224934	GOT1-DT	-1.72808	0.44489	no	-7.34687	0.00174868	down	-7.3605	0.00167719	down	-5.65701	0.0437694	down	NA	NA	NA
ENST00000655879	ENSG00000225470	JPX	-0.961746	0.714495	no	-6.1409	0.0252879	down	-4.98274	0.0498226	down	-5.21691	0.0717406	no	NA	NA	NA
ENST00000412369	ENSG00000225542	ZNF385D-AS1	-0.394531	0.869741	no	-4.39744	0.0387118	down	-4.41656	0.0381176	down	-4.02573	0.231995	no	NA	NA	NA
ENST00000426901	ENSG00000225632	ENSG00000225632	-0.86838	0.290723	no	-3.06577	0.00230081	down	-2.15151	0.0191098	down	-2.19776	0.0184133	down	0.930811	0.406419	no
ENST00000442781	ENSG00000226454	ENSG00000226454	-0.900817	0.27003	no	-2.2981	0.0247242	down	-4.06457	0.000735432	down	-1.39262	0.217808	no	-1.77396	0.400179	no
ENST00000664794	ENSG00000226519	LINC00390	-1.08634	0.594137	no	-3.97934	0.0326634	down	-4.01077	0.0331635	down	-2.94262	0.405797	no	NA	NA	NA
ENST00000668159	ENSG00000226688	ENTPD1-AS1	-1.02327	0.614339	no	-7.48986	0.00142074	down	-7.52178	0.00133304	down	-6.52299	0.00654297	down	NA	NA	NA
ENST00000659169	ENSG00000227258	SMIM2-AS1	-2.40523	0.229481	no	-4.20106	0.0467505	down	-4.22106	0.0461362	down	-1.82553	0.721314	no	NA	NA	NA
ENST00000654757	ENSG00000227258	SMIM2-AS1	-0.914292	0.456881	no	-3.92725	0.0042751	down	-2.67027	0.0237255	down	-3.0374	0.109625	no	1.28244	0.54067	no
ENST00000661272	ENSG00000228058	LINC01736	-1.82979	0.0668975	no	-3.59795	0.0017323	down	-3.64298	0.00241866	down	-1.77446	0.22975	no	-0.0377296	1	no
ENST00000691316	ENSG00000228794	LINC01128	0.810601	0.68464	no	-6.20303	0.00816784	down	-5.02014	0.0189687	down	-7.0729	0.00258497	down	NA	NA	NA
ENST00000608072	ENSG00000228817	BACH1-IT2	-0.379194	0.536398	no	1.495	0.0373802	up	1.72649	0.0193553	up	1.87875	0.0115096	down	0.232605	0.770589	no
ENST00000630766	ENSG00000228956	SATB1-AS1	-1.26592	0.0650224	no	-1.67583	0.0135636	down	-1.87773	0.00933253	down	-0.409398	0.547701	no	-0.193705	0.819379	no
ENST00000626526	ENSG00000228956	SATB1-AS1	-0.953128	0.220773	no	-1.73881	0.022246	down	-1.40791	0.0428733	down	-0.787831	0.40866	no	0.342555	0.689317	no
ENST00000627407	ENSG00000228956	SATB1-AS1	-1.86439	0.315683	no	-5.6158	0.00737406	down	-5.64415	0.00693088	down	-3.78608	0.152656	no	NA	NA	NA
ENST00000626921	ENSG00000228956	SATB1-AS1	-0.312312	0.827919	no	-5.64735	0.00702629	down	-5.67514	0.00665819	down	-5.37286	0.00204466	down	NA	NA	NA
ENST00000452901	ENSG00000230817	LINC01362	3.6421	0.152243	no	4.59552	0.0115494	up	5.11132	0.000289824	up	0.9954	0.550715	no	0.494567	0.672531	no
ENST00000685807	ENSG00000230989	HSBP1	-1.9119	0.385174	no	-6.92223	0.0029196	down	-6.95958	0.00279171	down	-5.06776	0.0845979	no	NA	NA	NA
ENST00000670431	ENSG00000231160	KLF3-AS1	-0.972764	0.67856	no	-4.97661	0.0306023	down	-6.1921	0.0128295	down	-4.02875	0.12591	no	NA	NA	NA
ENST00000665040	ENSG00000232021	LEF1-AS1	-2.32616	0.0513928	no	-1.48606	0.0239673	down	-1.58372	0.0466724	down	0.848182	0.490922	no	-0.0888346	0.932864	no
ENST00000506314	ENSG00000232021	LEF1-AS1	-2.04891	0.0537129	no	-2.18355	0.0318701	down	-1.80189	0.0178096	down	-0.132868	0.924112	no	0.395502	0.693992	no
ENST00000692331	ENSG00000232021	LEF1-AS1	-1.10216	0.188749	no	-2.90225	0.00514182	down	-1.93778	0.0389825	down	-1.79992	0.0610574	no	0.973984	0.448477	no
ENST00000701853	ENSG00000233008	LINC01725	-1.38216	0.101665	no	-2.0903	0.0259935	down	-2.85669	0.00991745	down	-0.70506	0.476583	no	-0.762036	0.668788	no
ENST00000666646	ENSG00000233184	DPH5-DT	2.89395	0.421165	no	5.53739	0.0492357	up	6.55749	0.0163844	up	2.66883	0.310381	no	1.03025	0.687935	no
ENST00000656972	ENSG00000235437	LINC01278	-1.75339	0.0605763	no	-1.70124	0.0461854	down	-2.23246	0.0207633	down	0.0680745	0.965916	no	-0.531016	0.55267	no
ENST00000660785	ENSG00000235621	LINC00494	-1.59491	0.478007	no	-7.45907	0.00149603	down	-7.49492	0.0014095	down	-5.91864	0.033522	down	NA	NA	NA
ENST00000413904	ENSG00000236859	NIFK-AS1	-1.09105	0.60284	no	-5.32756	0.0259303	down	-5.36411	0.0242397	down	-4.29231	0.0895236	no	NA	NA	NA
ENST00000671498	ENSG00000236859	NIFK-AS1	-0.761999	0.706091	no	-6.67621	0.00406797	down	-6.7136	0.00385339	down	-5.9717	0.0116665	down	NA	NA	NA
ENST00000454709	ENSG00000237280	ENSG00000237280	-1.21021	0.599849	no	-5.29409	0.0260997	down	-5.31585	0.025508	down	-4.12351	0.2117	no	NA	NA	NA
ENST00000428945	ENSG00000237301	ENSG00000237301	0.624504	0.681538	no	-3.84987	0.0370373	down	-3.87088	0.0370102	down	-4.50663	0.0314708	down	NA	NA	NA
ENST00000415182	ENSG00000237484	LINC01684	-1.33498	0.127305	no	-1.54208	0.0468618	down	-1.87755	0.0307906	down	-0.194061	0.837753	no	-0.328099	0.698603	no
ENST00000665788	ENSG00000237773	ENSG00000237773	0.157149	0.949969	no	-5.70023	0.0408277	down	-5.71256	0.0382559	down	-5.90089	0.0128907	down	NA	NA	NA
ENST00000658990	ENSG00000237877	LINC01473	-0.125272	0.878923	no	-1.89586	0.0130269	down	-1.51533	0.0442786	down	-1.76184	0.0196209	down	0.384273	0.62517	no
ENST00000447147	ENSG00000238121	LINC00426	0.726744	0.719009	no	3.11071	0.014454	up	2.56442	0.0493019	up	2.38932	0.0479677	up	-0.542225	0.584574	no
ENST00000655379	ENSG00000238197	PAXBP1-AS1	-1.90896	0.417919	no	-5.18281	0.0315622	down	-5.21005	0.0290969	down	-3.3041	0.330611	no	NA	NA	NA
ENST00000655910	ENSG00000238197	PAXBP1-AS1	-0.633407	0.695972	no	-6.03409	0.00347079	down	-4.84597	0.0098047	down	-5.42566	0.0115509	down	NA	NA	NA
ENST00000466557	ENSG00000241860	ENSG00000241860	0.477017	0.444887	no	1.3143	0.0406091	up	1.46671	0.0166302	up	0.845896	0.190183	no	0.161384	0.795944	no
ENST00000656753	ENSG00000242880	ENSG00000242880	3.92828	0.131906	no	4.97678	0.0221708	up	5.12948	0.00533116	up	1.08514	0.563931	no	0.143437	0.935188	no
ENST00000449573	ENSG00000243004	ENSG00000243004	-1.85414	0.115538	no	-3.08887	0.0103251	down	-3.46532	0.00937263	down	-1.23152	0.467878	no	-0.353033	1	no
ENST00000464242	ENSG00000244300	GATA2-AS1	3.29734	0.211349	no	4.39363	0.0342385	up	4.74276	0.00987617	up	1.13193	0.544135	no	0.343814	0.804146	no
ENST00000533146	ENSG00000245849	RAD51-AS1	4.86282	0.106827	no	5.08402	0.0360489	up	6.00177	5.05e-05	up	0.274886	0.91398	no	0.905582	0.48801	no
ENST00000501104	ENSG00000246528	SLCO5A1-AS1	3.36083	0.198409	no	4.97464	0.00666018	up	4.62535	0.00918844	up	1.64246	0.273826	no	-0.372141	0.815693	no
ENST00000511213	ENSG00000248810	LINC02432	4.61249	0.0619472	no	6.42216	2.04036e-07	up	6.48688	0.000259479	up	1.85183	0.0884606	no	0.0476584	0.981059	no
ENST00000668244	ENSG00000249249	TICAM2-AS1	-2.45939	0.102355	no	-3.89444	0.00616509	down	-3.92532	0.00575215	down	-1.45763	0.650673	no	0.0137892	1	no
ENST00000514840	ENSG00000249664	ENSG00000249664	2.14639	0.180256	no	3.52388	0.00170931	up	3.15956	0.00602025	up	1.38452	0.24016	no	-0.364466	0.700654	no
ENST00000507702	ENSG00000249673	NOP14-AS1	3.95545	0.0739152	no	6.05837	0.00509986	up	5.99924	0.000126874	up	2.14336	0.284571	no	-0.0647648	0.975628	no
ENST00000665721	ENSG00000249859	PVT1	4.26313	0.0569847	no	5.43083	0.00278515	up	5.59467	0.000722592	up	1.17106	0.510033	no	0.159346	0.919976	no
ENST00000515055	ENSG00000250135	ENSG00000250135	1.67934	0.153422	no	3.18623	0.00271381	up	2.4849	0.0326286	up	1.51536	0.140881	no	-0.698826	0.49959	no
ENST00000508851	ENSG00000251179	TMEM92-AS1	3.36764	0.192656	no	3.71457	0.0448271	up	4.24034	0.00742999	up	0.381259	0.905082	no	0.512437	0.629965	no
ENST00000654884	ENSG00000254319	LINC03021	-1.32561	0.400884	no	-4.41007	0.0326804	down	-4.43848	0.0326123	down	-3.12551	0.139411	no	NA	NA	NA
ENST00000536317	ENSG00000256377	MRPS35-DT	-0.633406	0.645698	no	-6.63989	0.000148189	down	-6.66486	0.000145178	down	-6.04575	0.00283466	down	NA	NA	NA
ENST00000554530	ENSG00000258476	LINC02207	-1.34367	0.157719	no	-1.93116	0.0363266	down	-2.04832	0.0356107	down	-0.58855	0.651685	no	-0.104575	1	no
ENST00000653567	ENSG00000259363	ENSG00000259363	-1.29049	0.147892	no	-1.94885	0.0259118	down	-2.36597	0.0123878	down	-0.645735	0.521392	no	-0.403761	0.719616	no
ENST00000663503	ENSG00000260271	ENSG00000260271	-1.9141	0.0691374	no	-2.2723	0.0227951	down	-2.15144	0.0235334	down	-0.353577	0.834825	no	0.139171	0.9593	no
ENST00000691845	ENSG00000260528	FAM157C	1.21528	0.0801352	no	1.36807	0.043882	up	1.45155	0.0229886	up	0.161721	0.832989	no	0.092913	0.894853	no
ENST00000564063	ENSG00000260879	ENSG00000260879	5.10592	0.0831114	no	6.36874	0.0194417	up	7.08459	0.0091714	up	1.2954	0.606965	no	0.725585	0.780417	no
ENST00000653193	ENSG00000262879	ENSG00000262879	-0.461763	0.565878	no	-3.86195	0.00176626	down	-2.88067	0.0281152	down	-3.40669	0.000870686	down	1.01341	0.518606	no
ENST00000654387	ENSG00000263072	ZNF213-AS1	-1.27022	0.563111	no	-6.79266	0.00337313	down	-6.8123	0.00327277	down	-5.57334	0.0491109	down	NA	NA	NA
ENST00000591311	ENSG00000267219	ENSG00000267219	-0.663832	0.484252	no	-2.73581	0.020004	down	-2.78276	0.0172945	down	-2.07139	0.0870964	no	-0.0341912	1	no
ENST00000667343	ENSG00000267248	ENSG00000267248	-1.73526	0.282095	no	-5.73916	0.000882767	down	-5.7665	0.000825922	down	-4.03082	0.21819	no	NA	NA	NA
ENST00000662029	ENSG00000267364	ENSG00000267364	-2.08788	0.415787	no	-5.81081	0.0372017	down	-5.85203	0.034714	down	-3.77334	0.253688	no	NA	NA	NA
ENST00000657681	ENSG00000267767	LINC01801	4.33688	0.0975139	no	6.3939	0.00197812	up	5.55001	0.0200248	up	2.09239	0.22453	no	-0.861488	0.629242	no
ENST00000601315	ENSG00000267808	ENSG00000267808	0.140013	0.949441	no	-2.80353	0.0453541	down	-2.83264	0.0460385	down	-2.96736	0.103088	no	-0.00412177	1	no
ENST00000599316	ENSG00000268355	ENSG00000268355	-1.97594	0.33689	no	-4.56385	0.0298042	down	-4.59215	0.0295111	down	-2.61008	0.473709	no	NA	NA	NA
ENST00000662557	ENSG00000268401	ENSG00000268401	3.64371	0.282333	no	5.30504	0.00872473	up	6.33568	0.000530849	up	1.71003	0.389864	no	1.02331	0.469231	no
ENST00000595277	ENSG00000269400	ENSG00000269400	-1.67706	0.20509	no	-2.51253	0.0482376	down	-4.81895	0.00218237	down	-0.862228	0.741119	no	-2.29412	0.413459	no
ENST00000653487	ENSG00000271109	LINC03049	5.44092	0.0571286	no	5.80065	0.0147631	up	5.847	0.016271	up	0.393684	0.861228	no	0.0263758	1	no
TCONS_00020191	ENSG00000271425	NBPF10	4.15129	0.0997039	no	4.15243	0.0301035	up	4.64997	0.0346196	up	0.0315228	1	no	0.493999	0.797141	no
ENST00000687332	ENSG00000272168	CASC15	-3.36099	0.0720757	no	-5.15952	0.0125018	down	-5.18699	0.0114658	down	-1.83381	0.71988	no	NA	NA	NA
ENST00000610155	ENSG00000273018	FAM106A	-0.121622	0.941724	no	2.31394	0.0329239	up	-5.67396	0.000722223	down	2.45719	0.115971	no	-7.9949	4.62833e-07	down
ENST00000612806	ENSG00000274995	ENSG00000274995	1.61687	0.305599	no	2.59842	0.0429569	up	2.27155	0.025165	up	0.996286	0.447614	no	-0.318225	0.775829	no
TCONS_00061626	ENSG00000275778	ENSG00000275778	-3.78958	0.183051	no	-9.68199	0.0012991	down	-9.71416	0.00125111	down	-5.9485	0.0322728	down	NA	NA	NA
TCONS_00137630	ENSG00000276043	UHRF1	0.498204	0.427777	no	1.48919	0.0301429	up	1.48137	0.0252463	up	1.00173	0.149226	no	0.000658717	1	no
ENST00000619200	ENSG00000276649	ENSG00000276649	1.65534	0.122352	no	2.40788	0.0105056	up	2.51322	0.00966834	up	0.748547	0.346273	no	0.110632	0.887677	no
ENST00000691375	ENSG00000283839	ENSG00000283839	1.45368	0.195782	no	2.66516	0.0229881	up	2.59448	0.0306871	up	1.22301	0.225508	no	-0.0625865	0.961458	no
ENST00000650061	ENSG00000285957	ENSG00000285957	-1.83895	0.277676	no	-4.43076	0.014221	down	-4.45482	0.0120657	down	-2.61009	0.473423	no	NA	NA	NA
ENST00000447206	ENSG00000286288	ENSG00000286288	-1.36202	0.455136	no	-4.50724	0.0202927	down	-4.53422	0.0177493	down	-3.20151	0.364342	no	NA	NA	NA
ENST00000662433	ENSG00000286330	ENSG00000286330	0.567805	0.742858	no	2.95678	0.0425667	up	2.92248	0.0140975	up	2.38138	0.189446	no	-0.0218601	0.988966	no
ENST00000657875	ENSG00000286381	NHIP	5.19565	0.0746266	no	7.30979	0.000361727	up	7.75413	0.00114721	up	2.15885	0.273642	no	0.420218	0.818458	no
ENST00000663297	ENSG00000287663	ENSG00000287663	-1.56794	0.121957	no	-5.46741	4.62117e-05	down	-1.97594	0.0448002	down	-3.94832	0.0554932	no	3.54917	0.0878664	no
ENST00000662663	ENSG00000287738	ENSG00000287738	-0.836236	0.529275	no	-2.87754	0.0427559	down	-4.77442	0.00294765	down	-2.04738	0.292213	no	-1.90047	0.686092	no
ENST00000685851	ENSG00000288836	ENSG00000288836	1.60911	0.196715	no	2.76169	0.020931	up	2.14353	0.0490198	up	1.15844	0.229333	no	-0.611053	0.476594	no
ENST00000686895	ENSG00000289062	ENSG00000289062	-0.225709	0.84694	no	-3.23614	0.0250689	down	-2.6628	0.0426182	down	-2.98683	0.0680338	no	0.57858	0.814309	no
ENST00000689091	ENSG00000289097	ENSG00000289097	1.83776	0.714878	no	4.25151	0.0399518	up	4.1838	0.0184717	up	2.45032	0.201777	no	-0.087594	1	no
ENST00000688112	ENSG00000289350	ENSG00000289350	-0.0480473	1	no	-5.90792	0.033466	down	-5.92023	0.0315286	down	-5.89745	0.0038583	down	NA	NA	NA
ENST00000688555	ENSG00000289361	ENSG00000289361	-0.0790486	0.909323	no	-1.40516	0.0496888	down	-1.56099	0.0192821	down	-1.32475	0.0657551	no	-0.145529	0.842311	no
ENST00000702395	ENSG00000289998	ENSG00000289998	1.969	0.133191	no	2.72627	0.00837754	up	1.93192	0.0227366	up	0.763969	0.541869	no	-0.786783	0.38047	no
ENST00000642991	ENSG00000290577	ENSG00000290577	-0.743007	0.223015	no	-1.99211	0.0164152	down	-1.71651	0.00781815	down	-1.24149	0.131871	no	0.292521	0.730216	no
ENST00000485741	ENSG00000290831	NSUN5P2	0.614986	0.794434	no	-7.79026	0.00443177	down	-7.82218	0.00414281	down	-8.44606	0.000568902	down	NA	NA	NA
ENST00000341745	ENSG00000290976	ENSG00000290976	-2.96604	0.148417	no	3.8725	0.0253463	up	-4.81226	0.0308655	down	6.84797	0.000495266	up	-8.70813	5.00666e-05	down
ENST00000551681	ENSG00000291066	ENSG00000291066	4.95951	0.0953387	no	5.97142	0.00310274	up	5.742	0.0410695	up	1.0465	0.59636	no	-0.25132	0.918038	no
ENST00000689096	ENSG00000291081	ENSG00000291081	-2.2147	0.0558526	no	-2.62626	0.0364257	down	-2.60362	0.0349329	down	-0.418815	0.884259	no	0.0561826	1	no
ENST00000702546	ENSG00000291109	CES1P1	2.23959	0.336664	no	5.14735	0.00190542	up	3.87574	0.047497	up	2.93306	0.118282	no	-1.25627	0.464213	no
ENST00000445230	ENSG00000291122	CASTOR3P	-1.84251	0.12834	no	-2.65246	0.0465809	down	-5.34507	0.00230394	down	-0.806031	0.565521	no	-2.70608	0.239792	no
ENST00000685435	ENSG00000291134	WASH2P	4.9205	0.100169	no	6.77859	0.00367578	up	6.79195	0.000824913	up	1.90093	0.389104	no	-0.00761712	1	no
ENST00000700786	ENSG00000291149	ENSG00000291149	1.43061	0.0861946	no	3.75427	3.72221e-06	up	2.77991	0.00482155	up	2.33172	0.00692167	up	-0.957321	0.313255	no
ENST00000430621	ENSG00000291224	ENSG00000291224	-1.09635	0.457686	no	-4.39882	0.0134786	down	-4.42219	0.0134883	down	-3.33631	0.107324	no	NA	NA	NA
TCONS_00020003	XLOC_004203	--	-1.26699	0.136881	no	-1.81788	0.0320213	down	-2.11411	0.0396533	down	-0.548342	0.542594	no	-0.278133	0.826722	no
TCONS_00174606	XLOC_035088	--	-2.85681	0.0713503	no	-4.92784	0.000808065	down	-4.38689	0.0218571	down	-2.04058	0.177287	no	0.525498	0.779184	no
TCONS_00174607	XLOC_035088	--	-1.74897	0.238354	no	4.05195	0.00790591	up	4.22397	0.0185665	up	5.82202	0.00199038	up	0.16778	0.935146	no
TCONS_00262350	XLOC_053828	--	0.961521	0.726128	no	-8.16893	0.00164866	down	-7.17842	0.00208119	down	-9.16025	0.00210349	down	1.03907	0.706996	no
ENST00000493723	ENSG00000105928	GSDME	NA	NA	NA	4.31809	0.0387853	up	5.24837	0.00238528	up	3.17007	0.0883856	no	0.919085	0.519542	no
ENST00000658203	ENSG00000230590	FTX	NA	NA	NA	4.90829	0.044241	up	6.88528	0.0114009	up	4.95599	0.042024	up	1.9555	0.381398	no
ENST00000507860	ENSG00000015479	MATR3	NA	NA	NA	5.0789	0.0123386	up	5.05672	0.0377057	up	5.12703	0.012036	up	-0.044562	1	no
ENST00000529978	ENSG00000250305	TRMT9B	NA	NA	NA	5.50371	0.0204275	up	5.41665	0.0235328	up	5.55474	0.0183071	up	-0.108447	0.981884	no
ENST00000483984	ENSG00000163930	BAP1	NA	NA	NA	5.57659	0.0181842	up	7.09779	0.00904376	up	5.62108	0.0165598	up	1.48825	0.509384	no
ENST00000588804	ENSG00000237298	TTN-AS1	NA	NA	NA	5.73125	0.0147864	up	5.63764	0.005147	up	5.78241	0.0134446	up	-0.106559	0.964687	no
ENST00000683834	ENSG00000171714	ANO5	NA	NA	NA	5.74371	0.022463	up	6.59124	0.000238369	up	5.79575	0.020253	up	0.828151	0.606477	no
ENST00000600396	ENSG00000141968	VAV1	NA	NA	NA	5.74909	0.0401791	up	6.74392	0.0130651	up	5.79359	0.0361563	up	0.969804	0.711389	no
ENST00000629178	ENSG00000179818	PCBP1-AS1	NA	NA	NA	5.81579	0.0145114	up	6.18565	0.0251825	up	5.85843	0.0128159	up	0.378967	0.874074	no
TCONS_00014572	ENSG00000037637	FBXO42	NA	NA	NA	5.94467	0.0326874	up	8.1827	0.000752645	up	5.99709	0.0290417	up	2.21419	0.335094	no
ENST00000675566	ENSG00000070061	ELP1	NA	NA	NA	6.26858	0.0218344	up	5.81747	0.0388233	up	6.32317	0.0191892	up	-0.464453	0.862159	no
ENST00000696709	ENSG00000221829	FANCG	NA	NA	NA	6.38973	2.24792e-05	up	6.64837	0.00155918	up	5.2241	0.000102465	up	0.237851	0.869705	no
ENST00000488933	ENSG00000259084	ENSG00000259084	NA	NA	NA	6.4927	0.0167797	up	7.19562	0.00213492	up	6.54253	0.0146824	up	0.678786	0.7611	no
TCONS_00011145	ENSG00000198625	MDM4	NA	NA	NA	6.73692	0.013484	up	7.81963	0.00460026	up	6.78185	0.0120066	up	1.04881	0.687233	no
ENST00000565416	ENSG00000261801	LOXL1-AS1	NA	NA	NA	6.83049	0.0120476	up	8.28525	0.000644746	up	6.87544	0.0109587	up	1.43103	0.538831	no
ENST00000694888	ENSG00000147533	GOLGA7	NA	NA	NA	6.91818	0.0104284	up	7.15461	0.00866064	up	6.96814	0.00920856	up	0.214647	0.936426	no
ENST00000504473	ENSG00000185324	CDK10	NA	NA	NA	6.92025	0.00286225	up	5.96745	0.0326064	up	6.9678	0.00256854	up	-0.976819	0.666844	no
ENST00000453010	ENSG00000231528	FAM225A	NA	NA	NA	7.48561	0.00140792	up	6.7276	0.0133574	up	7.53695	0.00133559	up	-0.782926	0.728998	no
ENST00000667371	ENSG00000242474	LINC03015	NA	NA	NA	7.5697	0.000253845	up	5.17897	0.0369795	up	6.41707	0.000740477	up	-2.4111	0.174277	no
ENST00000646512	ENSG00000100983	GSS	NA	NA	NA	7.64084	0.00544502	up	8.20343	0.000697141	up	7.68596	0.00502109	up	0.5361	0.821356	no
ENST00000698383	ENSG00000134900	TPP2	NA	NA	NA	8.07567	0.000908846	up	7.42822	0.00649564	up	8.13019	0.000859483	up	-0.63692	0.787125	no
TCONS_00024732	ENSG00000182827	ACBD3	NA	NA	NA	8.8197	0.00208866	up	9.5488	0.00146646	up	8.86963	0.00200745	up	0.707411	0.801232	no
ENST00000571091	ENSG00000186594	MIR22HG	NA	NA	NA	8.95062	3.08408e-05	up	7.66972	0.00521267	up	9.00414	3.11684e-05	up	-1.30553	0.534793	no
TCONS_00035012	ENSG00000198408	OGA	NA	NA	NA	8.96174	0.000326793	up	8.84268	4.86e-05	up	9.0161	0.000321688	up	-0.141229	0.942929	no
TCONS_00178523	ENSG00000100354	TNRC6B	NA	NA	NA	12.1798	4.55968e-05	up	12.8472	1.46e-06	up	12.2248	4.33886e-05	up	0.65066	0.773307	no
ENST00000561775	ENSG00000174444	RPL4	NA	NA	NA	13.8464	5.19043e-05	up	13.9472	0.000335761	up	13.8963	5.04276e-05	up	0.0864584	0.978052	no
