# Supplementary material for: Identification of GATA2-AS1- hsa-miR-125b-5p-PLAU ceRNA regulatory network as novel biomarkers for prethrombotic state in patients with coronary artery disease
Source: Research Square preprint supplement (doi:10.21203/rs.3.rs-7671890/v1), 2026-01-29
Supplement: Supplementary file 2 [file 4e431367924aef2f18384633.xlsx]

## Sheet: Abbreviations
AMI	acute myocardial infarction
AUC	area under the curve
BMI	Body Mass Index
C3a	complement component 3a
C5a	complement component 5a
CAD	coronary artery disease
ceRNA	competing endogenous RNA
CFH	complement factor H
circRNA	circular RNA
DEPs	differentially expressed proteins
DIA	Data-independent acquisition
ELISA	Enzyme-Linked ImmunosorbentAssays
F2RL2	coagulation factor II thrombin receptor like
FDR	false discovery rate
FVIII	coagulation factor Ⅷ
GATA2-AS1	GATA2 Antisense RNA 1
GSEA	Gene Set Enrichment Analysis
HIF1-α	hypoxia-inducible factor 1α
KEGG	Kyoto Encyclopedia of Genes and Genomes
lncRNA	long non-coding RNA
MAC	membrane attack complex
MASP-1	mannose-binding lectin serine protease 1
miRNA	microRNA
MPAR	maximum platelet aggregation rate
MREs	miRNA response elements
mRNA	messenger RNA
MT1P3	metallothionein 1 pseudogene 3
NFAT2	nuclear factor of activated T cells 1
NF-κB	nuclear factor-kappaB
NM	nailfold microcirculation
NPTS	without prethrombotic state
PBMCs	peripheral blood mononuclear cells
PCA	principal component analysis
PCBP1-AS1	PCBP1 Antisense RNA 1
PLAU	plasminogen activator, urokinase
PTS	prethrombotic state
qPCR	quantitative polymerase chain reaction
ROC	receiver operating characteristic
SD	standard deviation
SERPING1	Serpin Family G Member 1
TAT	thrombin-antithrombin complex
TLR4	Toll-like receptor 4
TNF	tumor necrosis factor
TNFSF4	tumor necrosis factor superfamily, member 4
TpP	thrombus precursor protein
VTE	venous thromboembolism
VWF	von Willebrand factor
