# Supplementary material for: Identification of GATA2-AS1- hsa-miR-125b-5p-PLAU ceRNA regulatory network as novel biomarkers for prethrombotic state in patients with coronary artery disease
Source: Research Square preprint supplement (doi:10.21203/rs.3.rs-7671890/v1), 2026-01-29
Supplement: Supplementary file 3 [file 70211a4454c1527d1810c1ea.xlsx]

## Sheet: 8DEcircRNA_expression
Supplementary Table 8. 8 candidate circRNAs.
circRNA	NPTSvsHEALTH log2FoldChange	NPTSvsHEALTH pvalue	NPTSvsHEALTH UP DOWN	PTSvsHEALTH log2FoldChange	PTSvsHEALTH pvalue	PTSvsHEALTH UP DOWN	AMIvsHEALTH log2FoldChange	AMIvsHEALTH pvalue	AMIvsHEALTH UP DOWN	PTSvsNPTS log2FoldChange	PTSvsNPTS pvalue	PTSvsNPTS UP DOWN	AMIvsPTS log2FoldChange	AMIvsPTS pvalue	AMIvsPTS UP DOWN
hsa_circ_0008240	3.33611	0.0642933	no	4.11672	0.00841542	up	4.17137	0.0109636	up	0.794216	0.421551	no	0.106785	0.898062	no
novel_circ_0016867	-0.894888	0.221163	no	-3.04783	0.0120646	down	-2.47959	0.0131337	down	-2.15974	0.114799	no	0.631565	0.786515	no
hsa_circ_0000274	1.1038	0.234101	no	2.34784	0.00650674	up	1.85224	0.0384825	up	1.25707	0.0274777	up	-0.526401	0.274154	no
hsa_circ_0003641	-0.280891	0.271731	no	-0.675102	0.0234766	down	-0.744033	0.00773416	down	-0.364457	0.23749	no	-0.0850247	0.774029	no
hsa_circ_0000722	-0.96147	0.285484	no	-1.22242	0.0471248	down	-2.36204	0.0264945	down	-0.250938	0.74155	no	-1.14395	0.350699	no
hsa_circ_0004688	1.70312	0.316	no	2.77696	0.0271628	up	3.06629	0.0170737	up	1.12723	0.255485	no	0.235886	0.73547	no
hsa_circ_0006577	0.483752	0.330261	no	-1.63974	0.0123115	down	-1.20767	0.0410339	down	-2.07715	5.05068e-05	down	0.413394	0.457638	no
hsa_circ_0002898	-0.510418	0.602672	no	-3.98451	0.0132676	down	-3.17326	0.0328613	down	-3.38652	0.0521177	no	0.790391	0.798726	no
