# Supplementary material for: Identification of GATA2-AS1- hsa-miR-125b-5p-PLAU ceRNA regulatory network as novel biomarkers for prethrombotic state in patients with coronary artery disease
Source: Research Square preprint supplement (doi:10.21203/rs.3.rs-7671890/v1), 2026-01-29
Supplement: Supplementary file 4 [file 9aea104a003345cbe0bcff60.xlsx]

## Sheet: Sheet2
Supplementary Table 2. Primer sequences for candidate genes used in qPCR validation
Gene Name	Gene Type	Primer Direction	Sequence (5'to3')	Size（bp）
hsa_circ_0008240	circRNA	Forward	CTCAGAAGCCTTGCCAGAA	59
		Reverse	AAGCCACCACCCCGACTC
GATA2-AS1	lncRNA	Forward	GTGAACGCCAGGACCGA	346
		Reverse	TCAAGTGATCCTCCTGCCTTAGCCT
PCBP1-AS1	lncRNA	Forward	GCCAAGGGGACCAGATG	152
		Reverse	CACGCAAGACCAGGAAGC
F5	mRNA	Forward	AAGCCCTTGAGCATCCATC	107
		Reverse	GCCACAGCGTCGTCCA
PLAU	mRNA	Forward	TCGTCTACCTGGGTCGCT	127
		Reverse	AAGGCAATGTCGTTGTGGT
SERPING1	mRNA	Forward	TGCCTGGGACTCTCTTGTGA	104
		Reverse	GCTCTGAGGTAGGAGGCTGA
GAPDH	mRNA	Forward	CACCCACTCCTCCACCTTTGA	188
		Reverse	TCTCTCTTCCTCTTGTGCTCTTGC
hsa-miR-125b-5p	miRNA	Forward	TCCCTGAGACCCTAACTTGTGA	66
		Reverse	AACGCTTCACGAATTTGCGT
hsa-miR-185-3p	miRNA	Forward	TGGCAGTGTCTTAGCTGGTTGT	66
		Reverse	AACGCTTCACGAATTTGCGT
hsa-miR-23b-3p	miRNA	Forward	ATCACATTGCCAGGGATTTCC	70
		Reverse	GTGCAGGGTCCGAGGT
U6	snRNA	Forward	CTGCGCAAGGATGACACGCAAATT	68
		Reverse	AACGCTTCACGAATTTGCGT
