# Supplementary material for: Identification of GATA2-AS1- hsa-miR-125b-5p-PLAU ceRNA regulatory network as novel biomarkers for prethrombotic state in patients with coronary artery disease
Source: Research Square preprint supplement (doi:10.21203/rs.3.rs-7671890/v1), 2026-01-29
Supplement: Supplementary file 5 [file a8633ec0c234161787fc26eb.xlsx]

## Sheet: 43候选蛋白各组间表达情况
Supplementary table 4. 43 candidate proteins
Protein	Description	GeneName	NPTSvsHEALTH Pvalue	NPTSvsHEALTH log2FC	NPTSvsHEALTH UPDOWN	PTSvsHEALTH Pvalue	PTSvsHEALTH log2FC	PTSvsHEALTH UPDOWN	AMI.vs.HEALTH Pvalue	AMI.vs.HEALTH log2FC	AMI.vs.HEALTH UP.DOWN	PTSvsNPTS Pvalue	PTSvsNPTS log2FC	PTSvsNPTS UPDOWN	AMI.vs.PTS Pvalue	AMI.vs.PTS log2FC	AMI.vs.PTS UP.DOWN
P08603	Complement factor H	CFH	0.0918426	0.200012	no	0.00562052	0.312935	up	0.0420001	0.255431	up	0.181053	0.112922	no	0.505222	-0.0575035	no
P00451	Coagulation factor VIII	F8	0.851497	0.130343	no	0.0498437	1.33098	up	0.00134184	1.24113	up	0.0772526	1.20064	no	0.779696	-0.0898539	no
A0A125U0V2	GCT-A1 heavy chain variable region (Fragment)	NA	0.146794	0.604038	no	0.00518039	0.946603	up	0.00514881	1.29376	up	0.19719	0.342565	no	0.232158	0.347158	no
A2N2F4	VK3 protein (Fragment)	VK3	0.268123	0.535354	no	0.00390313	-0.785139	down	0.00115763	-1.09944	down	0.0517695	-1.32049	no	0.220951	-0.314303	no
A2VDJ4	GNPTG protein (Fragment)	GNPTG	0.312117	0.48697	no	0.0391233	0.831737	up	0.041065	0.965866	up	0.317282	0.344767	no	0.661971	0.134129	no
A8K0R3	Osteoglycin (Osteoinductive factor, mimecan), isoform CRA_a	OGN	0.408162	0.373451	no	0.0285688	1.06007	up	0.0235351	0.754755	up	0.092699	0.686621	no	0.262683	-0.305317	no
B6EDE2	Epididymis luminal protein 180 (Fragment)	HEL180	0.79259	0.136942	no	0.0385615	-1.01512	down	0.0159267	-1.43315	down	0.105344	-1.15206	no	0.112204	-0.418032	no
A0A2U8J8N7	Ig heavy chain variable region (Fragment)	IgH	0.938664	0.0282882	no	0.0243574	-0.833247	down	0.0195296	-0.977543	down	0.0758421	-0.861536	no	0.744061	-0.144296	no
G1FM90	Anti-Influenza A hemagglutinin heavy chain variable region (Fragment)	NA	0.510399	-0.112442	no	0.0178571	-0.4581	down	0.0421176	-0.411505	down	0.0303315	-0.345658	down	0.765585	0.0465951	no
B7Z8Q2	cDNA FLJ55606, highly similar to Alpha-2-HS-glycoprotein	NA	0.339126	-0.199999	no	0.0312553	-0.333073	down	0.00568105	-0.573172	down	0.532099	-0.133074	no	0.154628	-0.2401	no
A0A2U8J8Z1	Ig heavy chain variable region (Fragment)	IgH	0.386983	-0.213993	no	0.0103441	-0.950229	down	0.00550943	-1.01711	down	0.00281344	-0.736235	down	0.789273	-0.0668774	no
A2KBC4	Anti-TN-C scFv (Fragment)	NA	0.326432	-0.22099	no	0.0410515	-0.52116	down	0.0436562	-0.492561	down	0.154738	-0.300171	no	0.881925	0.028599	no
A0A024R9J3	Collectin sub-family member 10 (C-type lectin), isoform CRA_a	COLEC10	0.162537	-0.238097	no	0.00508001	-0.489755	down	0.00922692	-0.416287	down	0.227157	-0.251659	no	0.674312	0.0734688	no
A0A0X9USK2	MS-A6 heavy chain variable region (Fragment)	NA	0.598733	-0.238169	no	0.025287	-1.43992	down	0.0466701	-1.4014	down	0.0277624	-1.20175	down	0.934626	0.0385254	no
A0A2U8J8J4	Ig heavy chain variable region (Fragment)	IgH	0.314745	-0.239576	no	0.019039	-0.577943	down	0.00772662	-0.828087	down	0.154481	-0.338368	no	0.329611	-0.250144	no
A0A0X9UWL5	GCT-A5 light chain variable region (Fragment)	NA	0.283427	-0.258049	no	0.0228299	-0.421606	down	0.00633404	-0.558435	down	0.491476	-0.163556	no	0.267221	-0.136829	no
A0A125QYY4	GCT-A7 heavy chain variable region (Fragment)	NA	0.23798	-0.268579	no	0.0314414	-0.503468	down	0.00140991	-0.905492	down	0.359468	-0.234889	no	0.131022	-0.402024	no
Q6MZQ6	Uncharacterized protein DKFZp686G11190	DKFZp686G11190	0.460499	-0.301061	no	0.0172444	-0.877306	down	0.0139093	-0.90621	down	0.242829	-0.576245	no	0.910372	-0.0289047	no
A0A0C4DH67	Immunoglobulin kappa variable 1-8	IGKV1-8	0.221084	-0.309303	no	0.0454334	-0.511146	down	0.0472146	-0.632027	down	0.447828	-0.201843	no	0.706776	-0.120881	no
A2IPI6	HRV Fab 027-VL (Fragment)	NA	0.174262	-0.329318	no	0.0440289	-0.535199	down	0.0441304	-0.613903	down	0.327597	-0.205881	no	0.76654	-0.0787038	no
A0A2U8J9A2	Ig heavy chain variable region (Fragment)	IgH	0.136523	-0.353852	no	0.00987436	-0.784841	down	0.0427487	-0.529511	down	0.0587589	-0.430989	no	0.201737	0.255329	no
Q0ZCJ1	Immunglobulin heavy chain variable region (Fragment)	NA	0.195856	-0.379851	no	0.0076927	-0.854445	down	0.000405565	-1.42349	down	0.169203	-0.474594	no	0.0954997	-0.569041	no
Q7Z2U7	Uncharacterized protein	NA	0.191537	-0.382394	no	0.0469923	-0.567462	down	0.00163374	-1.13069	down	0.582876	-0.185068	no	0.115739	-0.56323	no
A0A2U8J8H9	Ig heavy chain variable region (Fragment)	IgH	0.123746	-0.406677	no	0.00176775	-1.11277	down	0.00452294	-0.923886	down	0.0284561	-0.706089	down	0.53335	0.188879	no
A0A2U8J9C6	Ig heavy chain variable region (Fragment)	IgH	0.10822	-0.450377	no	0.0025043	-0.963092	down	0.00109487	-1.17324	down	0.0809079	-0.512715	no	0.39965	-0.21015	no
A0A0C4DH25	Immunoglobulin kappa variable 3D-20	IGKV3D-20	0.140907	-0.457223	no	0.0422321	-0.713189	down	0.0167153	-0.970694	down	0.253859	-0.255966	no	0.363819	-0.257505	no
Q5EFE6	Anti-RhD monoclonal T125 kappa light chain	NA	0.209808	-0.464718	no	0.0430154	-0.815917	down	0.021769	-1.04344	down	0.265907	-0.351198	no	0.222624	-0.22752	no
B3KQT9	Protein disulfide-isomerase	NA	0.100691	-0.497008	no	0.0210709	-0.963254	down	0.0383647	-0.662719	down	0.226963	-0.466245	no	0.434529	0.300535	no
A0A0X9T7T4	MS-D3 heavy chain variable region (Fragment)	NA	0.0883499	-0.499884	no	0.0246143	-0.797721	down	0.0336091	-0.718971	down	0.0260972	-0.297837	down	0.585077	0.0787499	no
A0A2U8J8Z6	Ig heavy chain variable region (Fragment)	IgH	0.0510361	-0.515773	no	0.00393773	-0.858978	down	6.98785e-05	-1.31017	down	0.314288	-0.343205	no	0.179519	-0.451194	no
A0A120HF66	IBM-A1 heavy chain variable region (Fragment)	NA	0.0571797	-0.526013	no	0.00445533	-0.943885	down	0.0114257	-0.848006	down	0.0874302	-0.417871	no	0.584323	0.0958784	no
A0A2Y9CYF4	Ig heavy chain variable region (Fragment)	IgH	0.204355	-0.538854	no	0.0323138	-1.19685	down	0.023362	-1.44625	down	0.0701923	-0.657998	no	0.55047	-0.249402	no
Q7M4S4	Granulocyte inhibitory protein	NA	0.106854	-0.542346	no	0.00602493	-0.889083	down	0.000370267	-1.72723	down	0.310917	-0.346737	no	0.0162749	-0.838149	down
Q6PIL8	IGK@ protein	IGK@	0.050766	-0.595115	no	0.012348	-0.86919	down	0.0133977	-0.866064	down	0.265567	-0.274075	no	0.990548	0.00312568	no
A0A2U8J920	Ig heavy chain variable region (Fragment)	IgH	0.149468	-0.658979	no	0.00979861	-1.10223	down	0.00463395	-1.69332	down	0.404481	-0.443247	no	0.188298	-0.591094	no
A0A2U8J942	Ig heavy chain variable region (Fragment)	IgH	0.0551813	-0.6773	no	0.021435	-0.946799	down	0.0102098	-1.20583	down	0.140052	-0.269499	no	0.293407	-0.259027	no
A0A0B4J1Y9	Immunoglobulin heavy variable 3-72	IGHV3-72	0.0550308	-0.69438	no	0.012841	-1.15621	down	0.0219982	-0.922404	down	0.0220085	-0.46183	down	0.420643	0.233807	no
A0A0B4J1X5	Immunoglobulin heavy variable 3-74	IGHV3-74	0.0724628	-0.758288	no	0.0284441	-0.956435	down	0.0393331	-0.912918	down	0.599018	-0.198147	no	0.906692	0.0435167	no
A0A286YFJ8	Immunoglobulin heavy constant gamma 4 (Fragment)	IGHG4	0.0624165	-0.779633	no	0.0104093	-1.2994	down	0.0115116	-1.3055	down	0.176422	-0.519762	no	0.988538	-0.0061084	no
A0A0A0MRZ8	Immunoglobulin kappa variable 3D-11	IGKV3D-11	0.0693233	-0.965768	no	0.0385443	-1.23649	down	0.0165511	-1.78916	down	0.41356	-0.270717	no	0.120004	-0.552678	no
A0N7J6	REV25-2 (Fragment)	NA	0.109176	-1.07435	no	0.0339569	-2.00216	down	0.0365531	-1.91873	down	0.0428788	-0.927814	down	0.825735	0.0834338	no
A0A384NL29	NA	NA	NA	NA	NA	0.00526902	-2.32316	down	0.00434361	-1.92217	down	NA	NA	NA	0.607954	0.400987	no
Q562V5	NA	NA	NA	NA	NA	0.00136682	-3.32463	down	0.025018	-1.33086	down	NA	NA	NA	0.00345769	1.99377	up
