# Supplementary material for: Identification of GATA2-AS1- hsa-miR-125b-5p-PLAU ceRNA regulatory network as novel biomarkers for prethrombotic state in patients with coronary artery disease
Source: Research Square preprint supplement (doi:10.21203/rs.3.rs-7671890/v1), 2026-01-29
Supplement: Supplementary file 6 [file b6d5e03b01b59669b540366e.xlsx]

## Sheet: Sheet1
Supplementary Table 3. The number of differentially expressed molecules
Comparison	DEPs	DEmRNAs	DEmiRNAs	DElncRNAs	DEcircRNAs
NPTS vs HEALTH	61	5490	205	2198	195
PTS vs HEALTH	122	2871	117	1925	108
AMI vs HEALTH	152	2854	166	1751	86
PTS vs NPTS	46	4308	121	1971	192
AMI vs PTS	59	1004	43	1566	97
DEPs, differentially expressed proteins; DEmRNAs, differentially expressed mRNAs; DEmiRNAs, differentially expressed miRNAs; DElncRNAs, differentially expressed lncRNAs; DEcircRNAs, differentially expressed circRNAs.
