# Supplementary material for: Identification of GATA2-AS1- hsa-miR-125b-5p-PLAU ceRNA regulatory network as novel biomarkers for prethrombotic state in patients with coronary artery disease
Source: Research Square preprint supplement (doi:10.21203/rs.3.rs-7671890/v1), 2026-01-29
Supplement: Supplementary file 7 [file bdb809aaf0e6e4ca03e1b491.xlsx]

## Sheet: merged_gene_table
Supplementary Table 5. 334 candidate mRNAs.
gene_id	gene_name	NPTSvsHEALTH log2FoldChange	NPTSvsHEALTH pvalue	NPTSvsHEALTH UP DOWN	PTSvsHEALTH log2FoldChange	PTSvsHEALTH pvalue	PTSvsHEALTH UP DOWN	AMIvsHEALTH log2FoldChange	AMIvsHEALTH pvalue	AMIvsHEALTH UP DOWN	PTSvsNPTS log2FoldChange	PTSvsNPTS pvalue	PTSvsNPTS UP DOWN	AMIvsPTS log2FoldChange	AMIvsPTS pvalue	AMIvsPTS UP DOWN
ENSG00000166444	DENND2B	-0.969416	0.0642229	No	-1.09245	0.0433899	down	1.77236	0.0481696	up	-0.0983013	0.846036	no	2.85181	0.00117518	up
ENSG00000221866	PLXNA4	-0.169079	0.425796	No	-0.345043	0.032514	down	-0.96885	9.87e-06	down	-0.152244	0.495646	no	-0.632304	0.00573748	down
ENSG00000174807	CD248	-0.975508	0.0656354	No	-2.95322	1.05e-07	down	-1.54389	0.00539907	down	-1.95413	0.0012533	down	1.39619	0.0286249	up
ENSG00000168404	MLKL	0.257505	0.0961906	No	0.640021	7.27e-05	up	0.300432	0.0442208	up	0.401898	0.0124096	up	-0.34423	0.0319484	down
ENSG00000215045	GRID2IP	-0.316061	0.280904	No	-2.04991	5.3e-07	down	-1.07375	0.0021295	down	-1.71015	1.46e-05	down	0.973154	0.0374036	up
ENSG00000116353	MECR	-0.0933387	0.548308	No	-0.694548	0.000130296	down	-0.336811	0.0318556	down	-0.57844	0.00116324	down	0.35163	0.0522067	no
ENSG00000149131	SERPING1	1.34986	1	No	2.73658	0.000503844	up	1.16724	0.0136304	up	1.42445	1	no	-1.57076	0.0523671	no
ENSG00000130066	SAT1	0.63424	0.0562504	No	1.06239	0.000128953	up	0.597444	0.0129019	up	0.450297	0.180423	no	-0.46862	0.064011	no
ENSG00000155324	GRAMD2B	-0.119442	0.470252	No	-0.338271	0.0361481	down	-0.694906	0.000560456	down	-0.199811	0.21742	no	-0.362888	0.0690554	no
ENSG00000124615	MOCS1	-0.891199	0.116925	No	-2.54665	2.64e-06	down	-1.43129	0.013378	down	-1.6343	0.00509904	down	1.10595	0.0694247	no
ENSG00000196542	SPTSSB	-0.595921	0.152864	No	-0.925047	0.00827507	down	-1.67117	8.43e-05	down	-0.314163	0.436354	no	-0.750778	0.0702057	no
ENSG00000152766	ANKRD22	0.71155	0.175583	No	2.14174	9.04e-05	up	1.0757	0.0347705	up	1.45779	0.0165251	up	-1.06587	0.0738266	no
ENSG00000100330	MTMR3	0.0521265	0.667176	No	0.54652	0.00306202	up	0.227806	0.0490578	up	0.516619	0.00656497	up	-0.324598	0.0833177	no
ENSG00000109685	NSD2	0.215223	0.227936	No	0.220035	0.039741	up	0.401514	0.00124318	up	0.0251445	0.882623	no	0.175445	0.0854611	no
ENSG00000087903	RFX2	0.343149	0.119386	No	1.43976	3.36e-05	up	0.859808	0.00134238	up	1.12455	0.00139285	up	-0.585129	0.119452	no
ENSG00000128383	APOBEC3A	0.608471	0.116468	No	1.49576	0.001137	up	0.761635	0.0497033	up	0.917095	0.0632009	no	-0.739431	0.132456	no
ENSG00000141526	SLC16A3	0.286777	0.0738523	No	0.426404	0.0272817	up	0.752933	0.000261461	up	0.161007	0.355547	no	0.319975	0.137087	no
ENSG00000116991	SIPA1L2	0.198336	0.415289	No	0.728849	0.00110201	up	0.39057	0.0132257	up	0.555287	0.0547975	no	-0.344524	0.138181	no
ENSG00000106477	CEP41	-0.338156	0.0780025	No	-0.840841	8.51e-05	down	-0.55229	0.00270153	down	-0.479144	0.0188507	down	0.281065	0.150954	no
ENSG00000213928	IRF9	0.23328	0.282086	No	0.648869	0.00273662	up	0.349215	0.041532	up	0.441292	0.0810198	no	-0.304175	0.172267	no
ENSG00000141497	ZMYND15	0.267123	0.453426	No	0.521622	0.0489679	up	0.884755	0.00202252	up	0.279039	0.400896	no	0.356482	0.175204	no
ENSG00000187801	ZFP69B	-0.51069	0.0565721	No	-0.811842	0.000323324	down	-0.481124	0.0484314	down	-0.281775	0.293714	no	0.325034	0.176844	no
ENSG00000136040	PLXNC1	0.0205032	0.922812	No	0.530908	0.00200732	up	0.344371	0.0470838	up	0.531691	0.00426149	up	-0.191505	0.182262	no
ENSG00000154027	AK5	-0.644753	0.0857391	No	-0.816683	0.00168475	down	-1.18439	0.000395	down	-0.148798	0.658628	no	-0.377567	0.183228	no
ENSG00000107745	MICU1	0.401885	0.0693423	No	0.284378	0.0482839	up	0.542671	0.00930999	up	-0.0953745	0.636668	no	0.252072	0.188163	no
ENSG00000278195	SSTR3	-0.173443	0.609644	No	-1.17438	0.00047715	down	-0.748783	0.0212866	down	-0.974495	0.00360598	down	0.415915	0.190957	no
ENSG00000166839	ANKDD1A	0.0646786	0.702714	No	0.694536	0.00141882	up	0.38893	0.0221978	up	0.653749	0.00665421	up	-0.31151	0.193166	no
ENSG00000100918	REC8	0.216369	0.15255	No	0.813419	0.00570993	up	0.397693	0.0451488	up	0.622434	0.0448157	up	-0.420626	0.196572	no
ENSG00000173281	PPP1R3B	0.336943	0.0533262	No	0.343703	0.00937401	up	0.568711	0.000951624	up	0.0299677	0.859375	no	0.218487	0.196788	no
ENSG00000166920	C15orf48	0.805827	0.151846	No	2.17956	0.00230681	up	1.30462	0.0394742	up	1.39178	0.0292127	up	-0.875566	0.198574	no
ENSG00000025039	RRAGD	0.27776	0.235951	No	0.520288	0.0184351	up	0.755411	0.000311338	up	0.26323	0.19518	no	0.229477	0.19917	no
ENSG00000076356	PLXNA2	0.370145	0.0856797	No	0.50688	0.00560448	up	0.830235	0.00173045	up	0.159115	0.397597	no	0.316183	0.200643	no
ENSG00000162777	DENND2D	-0.0984065	0.525214	No	-0.608179	0.000514746	down	-0.388241	0.035156	down	-0.488015	0.000317178	down	0.213409	0.206662	no
ENSG00000203710	CR1	0.227808	0.247754	No	0.56382	0.00273726	up	0.980114	0.000827988	up	0.358637	0.1462	no	0.406276	0.208337	no
ENSG00000196155	PLEKHG4	-0.0566261	0.800461	No	-0.471163	0.0224176	down	-0.745573	0.00106313	down	-0.39458	0.0761754	no	-0.281699	0.20944	no
ENSG00000179314	WSCD1	-1.29351	0.12794	No	-5.66559	1.26e-06	down	-2.24244	0.0321229	down	-4.33911	0.0114182	down	3.38953	0.210368	no
ENSG00000092621	PHGDH	0.232122	0.603722	No	-0.729725	0.0147425	down	-1.22448	0.00180827	down	-0.940017	0.0420171	down	-0.506773	0.21659	no
ENSG00000165025	SYK	0.222911	0.238137	No	0.727363	0.000290036	up	0.485839	0.022197	up	0.524564	0.00204455	up	-0.246408	0.219591	no
ENSG00000163564	PYHIN1	-0.250717	0.344006	No	-0.423732	0.0455184	down	-0.685809	0.00456875	down	-0.157258	0.509346	no	-0.263979	0.221733	no
ENSG00000183542	KLRC4	-0.578134	0.235335	No	-0.802815	0.0115727	down	-1.21685	0.000665328	down	-0.211785	0.659027	no	-0.416033	0.225442	no
ENSG00000102554	KLF5	0.516747	0.0820014	No	1.10964	0.000524752	up	0.790439	0.00775354	up	0.616094	0.0255531	up	-0.325532	0.239203	no
ENSG00000090530	P3H2	-0.514661	0.115762	No	-0.679238	0.0135741	down	-1.01969	0.000285596	down	-0.140613	0.678131	no	-0.345912	0.241198	no
ENSG00000120256	LRP11	1.28132	0.0644064	No	1.35838	0.0351665	up	2.10936	0.00223128	up	0.0939302	0.882593	no	0.737107	0.249926	no
ENSG00000100284	TOM1	0.256809	0.0850091	No	0.629267	0.000199544	up	0.457076	0.000807576	up	0.393969	0.0177164	up	-0.178171	0.258873	no
ENSG00000148200	NR6A1	0.029287	0.885483	No	0.415374	0.0315895	up	0.641772	0.00175472	up	0.408792	0.0362525	up	0.219558	0.270338	no
ENSG00000163694	RBM47	0.0259724	0.930293	No	1.46379	3.08e-05	up	1.06157	0.00194809	up	1.46714	8.06e-06	up	-0.405289	0.273087	no
ENSG00000049192	ADAMTS6	0.0443673	0.897455	No	-0.972946	5.11e-06	down	-0.699817	0.00406306	down	-0.996465	0.00423776	down	0.266764	0.278914	no
ENSG00000179542	SLITRK4	-0.237706	0.318521	No	0.544337	0.0132147	up	0.813501	0.0019285	up	0.801057	0.000144469	up	0.265255	0.280548	no
ENSG00000178460	MCMDC2	-0.409708	0.397936	No	-1.79975	0.000339839	down	-1.1784	0.0263322	down	-1.37176	0.00667053	down	0.620007	0.281509	no
ENSG00000152455	SUV39H2	-0.00535784	0.979825	No	-0.517971	0.00979939	down	-0.775623	0.000718578	down	-0.49461	0.0251104	down	-0.260955	0.284649	no
ENSG00000126391	FRMD8	0.328563	0.349175	No	0.470451	0.0263851	up	0.713473	0.0118865	up	0.164317	0.59065	no	0.235508	0.285485	no
ENSG00000198517	MAFK	0.333985	0.109053	No	0.814379	7.95e-05	up	0.569272	0.0190546	up	0.501337	0.0107257	up	-0.250313	0.287321	no
ENSG00000188167	TMPPE	0.301425	0.0527884	No	0.462999	0.00042228	up	0.32958	0.0262215	up	0.183156	0.191449	no	-0.139373	0.295414	no
ENSG00000154359	LONRF1	0.223939	0.181404	No	0.667483	6.71e-05	up	0.45465	0.0121545	up	0.467349	0.0183295	up	-0.218252	0.301143	no
ENSG00000135596	MICAL1	0.245026	0.0952682	No	0.380837	0.00512036	up	0.535609	0.000710433	up	0.159584	0.229141	no	0.148041	0.303721	no
ENSG00000132205	EMILIN2	0.261206	0.248538	No	0.787852	0.000214226	up	0.567301	0.0141211	up	0.54858	0.00963359	up	-0.225639	0.309655	no
ENSG00000159899	NPR2	-0.342612	0.220614	No	-0.84467	0.0049169	down	-0.588198	0.023946	down	-0.477872	0.0760723	no	0.247844	0.310293	no
ENSG00000198554	WDHD1	-0.373146	0.0810178	No	-0.499728	0.01399	down	-0.669402	0.000577165	down	-0.109157	0.573484	no	-0.174262	0.311644	no
ENSG00000128253	RFPL2	0.789054	0.266245	No	1.50447	0.0038474	up	1.06762	0.0490354	up	0.728874	0.223457	no	-0.446796	0.314423	no
ENSG00000239474	KLHL41	-1.0402	0.0758871	No	-2.59202	0.00720181	down	-1.34634	0.0332961	down	-1.52769	0.16019	no	1.23926	0.317294	no
ENSG00000119979	DENND10	0.253347	0.170926	No	0.303015	0.0240794	up	0.462574	0.00291421	up	0.0713107	0.695231	no	0.154588	0.321635	no
ENSG00000167664	TMIGD2	-0.155738	0.567766	No	-1.01108	8.49e-05	down	-0.645349	0.0489728	down	-0.834518	0.0087004	down	0.356404	0.33136	no
ENSG00000184060	ADAP2	0.419769	0.107094	No	0.828484	0.00514881	up	1.164	1.48e-05	up	0.434894	0.193239	no	0.327719	0.332287	no
ENSG00000105793	GTPBP10	-0.441493	0.0599942	No	-0.579729	0.00559098	down	-0.809114	0.000261461	down	-0.120778	0.623035	no	-0.23165	0.332347	no
ENSG00000176171	BNIP3	-0.104246	0.548783	No	-0.561039	0.00135524	down	-0.377472	0.0458865	down	-0.436374	0.00863352	down	0.176911	0.333371	no
ENSG00000198780	FAM169A	-0.497202	0.08364	No	-0.688299	0.00722705	down	-0.863058	0.00246241	down	-0.174662	0.332317	no	-0.177968	0.339653	no
ENSG00000148737	TCF7L2	0.0328702	0.896474	No	1.05939	0.000684848	up	0.701971	0.0265164	up	1.05383	0.00151257	up	-0.360991	0.340474	no
ENSG00000187583	PLEKHN1	0.407063	0.399122	No	0.833288	0.047266	up	1.19596	0.00398766	up	0.452245	0.300864	no	0.355638	0.340603	no
ENSG00000182541	LIMK2	0.358629	0.0690599	No	0.653179	0.000138181	up	0.855029	2.79e-06	up	0.321546	0.138433	no	0.193684	0.34285	no
ENSG00000150636	CCDC102B	-0.361624	0.121769	No	-0.775927	0.000420922	down	-0.536438	0.0239579	down	-0.394248	0.105597	no	0.233294	0.349903	no
ENSG00000186818	LILRB4	0.409453	0.115504	No	0.697128	0.000810106	up	1.03006	0.00384423	up	0.311557	0.197002	no	0.324002	0.349915	no
ENSG00000105339	DENND3	0.147337	0.425189	No	0.572841	0.00664324	up	0.392605	0.00836373	up	0.448077	0.0434076	up	-0.185177	0.352141	no
ENSG00000133246	PRAM1	0.374778	0.139059	No	0.566133	0.0214869	up	0.869521	0.00468184	up	0.217347	0.415488	no	0.295544	0.353942	no
ENSG00000133816	MICAL2	0.112185	0.516702	No	0.412692	0.0134219	up	0.615658	0.0110181	up	0.322323	0.00378365	up	0.195544	0.35651	no
ENSG00000168056	LTBP3	-0.227241	0.349703	No	-0.738185	0.000539122	down	-0.508696	0.0285797	down	-0.487815	0.0546865	no	0.220691	0.357333	no
ENSG00000104324	CPQ	0.410658	0.0520146	No	0.341856	0.0163249	up	0.484906	0.00264248	up	-0.0467264	0.815507	no	0.137331	0.359806	no
ENSG00000176438	SYNE3	0.102012	0.348148	No	0.305316	0.0120897	up	0.416046	0.000430237	up	0.226528	0.0391237	up	0.104179	0.364424	no
ENSG00000134539	KLRD1	-0.180537	0.580013	No	-0.578329	0.0196708	down	-0.873735	0.0166693	down	-0.383574	0.163207	no	-0.297233	0.366748	no
ENSG00000120645	IQSEC3	-0.760923	0.417015	No	-1.751	0.0116799	down	-2.46109	0.000490149	down	-0.963908	0.257473	no	-0.711549	0.372851	no
ENSG00000206535	LNP1	-0.544615	0.101656	No	-1.21183	0.00683227	down	-0.776356	0.0206036	down	-0.650289	0.181351	no	0.430617	0.378453	no
ENSG00000198743	SLC5A3	-0.390031	0.0519159	No	-0.404345	0.00157664	down	-0.532717	2.69e-05	down	0.00481205	0.981828	no	-0.132413	0.383177	no
ENSG00000143382	ADAMTSL4	0.572304	0.0617664	No	0.557049	0.00780023	up	0.834529	0.011971	up	0.0116228	0.966557	no	0.269517	0.385423	no
ENSG00000182606	TRAK1	0.101636	0.441646	No	0.657468	0.000436334	up	0.461647	0.0103196	up	0.579836	0.00472168	up	-0.201315	0.387715	no
ENSG00000127946	HIP1	0.157783	0.307686	No	0.385861	0.000251467	up	0.498009	3.03e-05	up	0.248735	0.107941	no	0.106511	0.3963	no
ENSG00000114745	GORASP1	0.293347	0.109976	No	0.528779	0.00369828	up	0.357752	0.034848	up	0.256199	0.242432	no	-0.17714	0.3964	no
ENSG00000198216	CACNA1E	0.957671	0.240557	No	1.28361	0.029212	up	1.76499	0.00339759	up	0.342172	0.65294	no	0.474194	0.399545	no
ENSG00000143889	HNRNPLL	0.212868	0.202906	No	0.439046	0.00541931	up	0.617777	0.0046961	up	0.245261	0.0975411	no	0.175066	0.403771	no
ENSG00000019169	MARCO	0.657916	0.059109	No	1.69215	1.37e-07	up	2.14419	0.000122903	up	1.05479	0.000101718	up	0.436987	0.405917	no
ENSG00000140044	JDP2	0.413654	0.108602	No	1.02632	0.000430075	up	0.787273	0.00235985	up	0.63586	0.0315539	up	-0.245485	0.408338	no
ENSG00000164251	F2RL1	0.318056	0.130701	No	0.637609	0.00389795	up	0.841767	0.000708171	up	0.337304	0.0899716	no	0.198024	0.413725	no
ENSG00000146094	DOK3	0.460433	0.0710623	No	0.504826	0.0155125	up	0.756769	0.0142066	up	0.0703864	0.770453	no	0.243228	0.417122	no
ENSG00000120875	DUSP4	0.545297	0.201643	No	1.12459	0.000267488	up	1.4236	0.000652816	up	0.597495	0.106296	no	0.292489	0.422088	no
ENSG00000066382	MPPED2	-0.28751	0.606593	No	-2.13666	1.73e-05	down	-1.56063	0.00461797	down	-1.83691	0.00740721	down	0.580231	0.433263	no
ENSG00000177706	FAM20C	0.573795	0.0519737	No	0.753408	0.00167906	up	1.01286	0.00137805	up	0.205692	0.490226	no	0.25108	0.433427	no
ENSG00000167202	TBC1D2B	0.0892458	0.456573	No	0.206341	0.0421794	up	0.30016	0.0061396	up	0.139445	0.260871	no	0.0884387	0.43922	no
ENSG00000100281	HMGXB4	0.293804	0.0561781	No	0.5037	0.000259307	up	0.394955	0.00959809	up	0.230822	0.112601	no	-0.113317	0.445595	no
ENSG00000145391	SETD7	0.106493	0.426959	No	0.483849	0.000116727	up	0.372948	0.0152364	up	0.39908	0.00248877	up	-0.116877	0.449598	no
ENSG00000102738	MRPS31	-0.248579	0.140107	No	-0.475466	0.0205344	down	-0.317617	0.026546	down	-0.208631	0.343156	no	0.152488	0.456001	no
ENSG00000135677	GNS	0.308685	0.134598	No	0.389935	0.041993	up	0.568894	0.0298271	up	0.101038	0.511336	no	0.172939	0.459517	no
ENSG00000288867	PPIAL4C	-0.874302	0.0646556	No	-1.24705	0.0314734	down	-0.847765	0.0443918	down	-0.351745	0.551698	no	0.394008	0.464537	no
ENSG00000053918	KCNQ1	0.391278	0.0689486	No	0.347012	0.0352967	up	0.539459	0.0303662	up	-0.0192511	0.930045	no	0.183629	0.466333	no
ENSG00000153066	TXNDC11	0.252669	0.251025	No	0.545005	0.00722637	up	0.422354	0.0226124	up	0.310989	0.14341	no	-0.128429	0.466998	no
ENSG00000184014	DENND5A	0.148091	0.286998	No	0.471935	0.00106331	up	0.354884	0.0107591	up	0.347146	0.0402867	up	-0.123748	0.467248	no
ENSG00000171812	COL8A2	0.595557	0.0503431	No	0.559399	0.0371557	up	0.880578	0.0245971	up	-0.00894801	0.979797	no	0.308305	0.468598	no
ENSG00000167637	ZNF283	-0.475831	0.0736787	No	-0.888047	0.000453273	down	-0.703912	0.00532566	down	-0.390558	0.133803	no	0.178951	0.468775	no
ENSG00000164904	ALDH7A1	-0.566848	0.11771	No	-1.24646	0.000155527	down	-0.917916	0.0105576	down	-0.662205	0.141595	no	0.326282	0.470733	no
ENSG00000139132	FGD4	0.151447	0.521059	No	0.788699	0.00299714	up	0.576061	0.0407297	up	0.660226	0.0134606	up	-0.219618	0.474072	no
ENSG00000198453	ZNF568	-0.305517	0.159666	No	-0.544097	0.0184945	down	-0.712118	2.81e-05	down	-0.222211	0.411251	no	-0.171354	0.477141	no
ENSG00000163602	RYBP	0.0065787	0.980678	No	0.819184	0.00380983	up	0.59668	0.0421845	up	0.838377	0.00732706	up	-0.229451	0.487376	no
ENSG00000101384	JAG1	0.436599	0.0763633	No	0.706608	0.0052778	up	0.54195	0.046884	up	0.290007	0.173466	no	-0.169413	0.493857	no
ENSG00000115155	OTOF	1.10404	0.133187	No	2.47016	0.00615695	up	1.79929	0.0274946	up	1.41084	0.174185	no	-0.674971	0.500525	no
ENSG00000271605	MILR1	0.10003	0.608491	No	0.425029	0.00477081	up	0.597496	0.0187882	up	0.347241	0.0620836	no	0.164936	0.505472	no
ENSG00000119535	CSF3R	0.373987	0.0797455	No	0.547557	0.00105119	up	0.675003	0.000402062	up	0.197955	0.33508	no	0.120128	0.510503	no
ENSG00000179715	PCED1B	-0.373659	0.051586	No	-0.625525	0.000859085	down	-0.493574	0.0203059	down	-0.22941	0.170783	no	0.126373	0.511039	no
ENSG00000104974	LILRA1	0.492419	0.0572295	No	0.602446	0.00278253	up	0.795558	0.00109042	up	0.136034	0.645834	no	0.18633	0.513501	no
ENSG00000147684	NDUFB9	0.0830692	0.644728	No	0.315207	0.0360944	up	0.424739	0.00639319	up	0.251078	0.169007	no	0.103924	0.51368	no
ENSG00000119048	UBE2B	0.326899	0.239155	No	0.678477	0.00300251	up	0.583956	0.0225026	up	0.37208	0.0510685	no	-0.100768	0.516032	no
ENSG00000149269	PAK1	0.364835	0.0764087	No	0.541117	4.71e-05	up	0.424158	0.0199212	up	0.199729	0.338538	no	-0.123047	0.51922	no
ENSG00000167207	NOD2	0.27959	0.278433	No	0.646645	0.00208628	up	0.505788	0.0245231	up	0.391437	0.12891	no	-0.147057	0.520171	no
ENSG00000140749	IGSF6	0.555357	0.0726685	No	0.695151	0.00431529	up	0.55969	0.0280948	up	0.161469	0.560879	no	-0.139553	0.52434	no
ENSG00000054967	RELT	0.199671	0.283748	No	0.70909	0.000431447	up	0.572944	0.00161684	up	0.535123	0.0189448	up	-0.14238	0.527778	no
ENSG00000221890	NPTXR	0.342157	0.216387	No	-0.804698	2.34e-05	down	-0.639788	0.00764927	down	-1.12677	8.67e-05	down	0.157039	0.528744	no
ENSG00000134046	MBD2	0.236159	0.115769	No	0.38886	0.00108149	up	0.474534	0.00218943	up	0.173644	0.137707	no	0.0809879	0.532688	no
ENSG00000160293	VAV2	0.342557	0.106109	No	0.374952	0.00168875	up	0.513339	0.0144235	up	0.0572614	0.788647	no	0.13056	0.53678	no
ENSG00000104972	LILRB1	0.408109	0.0665644	No	0.452299	0.00227478	up	0.636883	0.024114	up	0.0696045	0.763927	no	0.177901	0.541814	no
ENSG00000152380	FAM151B	-0.0900629	0.704636	No	0.45894	0.046642	up	0.659636	0.0454584	up	0.569306	0.00881615	up	0.195127	0.541905	no
ENSG00000109686	SH3D19	-0.118021	0.652074	No	-0.42587	0.0411751	down	-0.516771	0.014654	down	-0.28827	0.208719	no	-0.0974884	0.542884	no
ENSG00000123360	PDE1B	0.168241	0.396897	No	0.690045	1.71e-05	up	0.574243	0.00347761	up	0.542853	0.0066791	up	-0.120561	0.544841	no
ENSG00000166126	AMN	-0.531461	0.181357	No	-1.01022	0.00630828	down	-0.787232	0.0410668	down	-0.454703	0.220511	no	0.213892	0.546144	no
ENSG00000018699	TTC27	-0.166341	0.131776	No	-0.226773	0.0453147	down	-0.311652	0.0282421	down	-0.0406994	0.730716	no	-0.0898756	0.54641	no
ENSG00000186230	ZNF749	-0.259717	0.217915	No	-0.63828	0.0107815	down	-0.494381	0.0190512	down	-0.353502	0.123412	no	0.138031	0.548584	no
ENSG00000105835	NAMPT	0.43576	0.259085	No	1.04776	0.00692635	up	0.841071	0.0136742	up	0.632105	0.109733	no	-0.211192	0.551921	no
ENSG00000130487	KLHDC7B	0.425154	0.151976	No	0.700604	0.0208474	up	0.962077	0.0194713	up	0.303775	0.349603	no	0.255779	0.552505	no
ENSG00000058804	NDC1	-0.0695214	0.700636	No	-0.373163	0.0270883	down	-0.454739	0.00551903	down	-0.285916	0.0791055	no	-0.0867393	0.552829	no
ENSG00000189127	ANKRD34B	-0.335085	0.433044	No	1.231	0.00135918	up	1.60878	0.00969503	up	1.58579	0.000168625	up	0.364838	0.554108	no
ENSG00000197563	PIGN	-0.174175	0.299161	No	-0.396541	0.00169042	down	-0.316942	0.0425285	down	-0.202572	0.137931	no	0.074604	0.555271	no
ENSG00000132669	RIN2	0.273972	0.237026	No	0.663178	0.000152534	up	0.516578	0.0473591	up	0.412485	0.0681697	no	-0.152797	0.555326	no
ENSG00000054523	KIF1B	0.0673072	0.624445	No	0.48097	0.00013261	up	0.40125	0.00555177	up	0.433282	0.00097027	up	-0.0838709	0.555539	no
ENSG00000134222	PSRC1	0.423483	0.108904	No	0.435623	0.03198	up	0.615459	0.0477648	up	0.0359161	0.88351	no	0.173678	0.560552	no
ENSG00000197410	DCHS2	-1.70779	0.0815902	No	-2.10394	0.04213	down	-2.98629	0.0103727	down	-0.37332	0.76148	no	-0.902734	0.565894	no
ENSG00000142156	COL6A1	-0.501434	0.108826	No	-0.994074	0.00950569	down	-0.762281	0.0158757	down	-0.467064	0.243041	no	0.223813	0.576688	no
ENSG00000214456	PLIN5	0.822642	0.402601	No	1.55051	0.0171957	up	1.86966	0.00252156	up	0.758869	0.375061	no	0.311854	0.577844	no
ENSG00000198585	NUDT16	0.578311	0.0519524	No	1.54271	0.000113729	up	1.26779	0.000368468	up	0.982591	0.0346846	up	-0.275331	0.578187	no
ENSG00000183023	SLC8A1	0.300233	0.166125	No	0.797759	0.000115969	up	0.654794	0.0111252	up	0.520649	0.0227095	up	-0.147161	0.587376	no
ENSG00000130208	APOC1	3.10235	0.186883	No	4.05302	0.00621598	up	3.56634	0.0310918	up	0.975417	0.374014	no	-0.497239	0.588084	no
ENSG00000175287	PHYHD1	-0.296588	0.333391	No	-1.25274	0.000812459	down	-0.987518	0.0231321	down	-0.933028	0.0062263	down	0.262147	0.588656	no
ENSG00000135842	NIBAN1	0.223701	0.260869	No	0.558163	0.0093062	up	0.440368	0.0321382	up	0.356756	0.116553	no	-0.124242	0.58975	no
ENSG00000150045	KLRF1	-0.212775	0.501413	No	-0.789463	0.0140275	down	-0.945769	0.00447081	down	-0.563599	0.0370425	down	-0.159873	0.59005	no
ENSG00000185482	STAC3	0.50021	0.0799059	No	0.695984	0.00470793	up	0.562095	0.0315959	up	0.221079	0.43723	no	-0.140777	0.592437	no
ENSG00000076650	GPATCH1	-0.142826	0.133345	No	-0.318138	0.00697896	down	-0.239737	0.030886	down	-0.15543	0.206524	no	0.0736002	0.594484	no
ENSG00000131686	CA6	-0.72032	0.318372	No	-2.07488	0.0135474	down	-1.58594	0.0455941	down	-1.33116	0.102372	no	0.483937	0.596257	no
ENSG00000156026	MCU	0.215358	0.241478	No	0.30837	0.0453887	up	0.383503	0.0160657	up	0.113056	0.472513	no	0.0703449	0.599214	no
ENSG00000093072	ADA2	0.370733	0.13211	No	0.605207	0.00552747	up	0.486235	0.0248521	up	0.258586	0.329092	no	-0.12592	0.600139	no
ENSG00000165168	CYBB	0.34153	0.141639	No	1.06503	2.29e-05	up	0.927647	7.34e-05	up	0.747725	0.00651983	up	-0.143084	0.60128	no
ENSG00000197712	FAM114A1	0.186012	0.581814	No	0.667565	0.0223895	up	0.854993	0.0193009	up	0.501749	0.116512	no	0.184094	0.602622	no
ENSG00000136002	ARHGEF4	-0.132508	0.79244	No	-0.85004	0.033609	down	-1.09158	0.0117111	down	-0.697366	0.201534	no	-0.250066	0.60484	no
ENSG00000156787	TBC1D31	0.0202447	0.915847	No	-0.496873	0.0168159	down	-0.596426	0.0029859	down	-0.499292	0.00716138	down	-0.103466	0.60709	no
ENSG00000115257	PCSK4	-0.484236	0.276933	No	-1.16407	0.0141697	down	-0.934827	0.0455408	down	-0.657226	0.0996951	no	0.221302	0.607845	no
ENSG00000220008	LINGO3	0.152919	0.56683	No	0.866175	0.00662441	up	1.02809	2.81e-05	up	0.734922	0.0243691	up	0.155173	0.613996	no
ENSG00000136205	TNS3	0.361262	0.0543578	No	0.510012	0.000632922	up	0.641147	0.00865004	up	0.172773	0.356319	no	0.123515	0.614117	no
ENSG00000164741	DLC1	0.537282	0.140386	No	1.29035	0.000104913	up	1.49326	0.000466887	up	0.77148	0.0145887	up	0.192804	0.621732	no
ENSG00000197928	ZNF677	-0.782311	0.0598139	No	-0.498586	0.0107256	down	-0.657367	0.0444115	down	0.303755	0.470913	no	-0.16402	0.622065	no
ENSG00000181220	ZNF746	0.156968	0.0645527	No	0.34683	0.00190226	up	0.28357	0.0242447	up	0.211567	0.0683295	no	-0.0698948	0.622306	no
ENSG00000085741	WNT11	1.37001	0.132774	No	2.39208	0.00354808	up	2.07063	0.0410443	up	1.04552	0.0728792	no	-0.327674	0.624332	no
ENSG00000007129	CEACAM21	-0.349808	0.178277	No	-0.567408	0.00662763	down	-0.480655	0.0195031	down	-0.197138	0.402538	no	0.0792094	0.626157	no
ENSG00000119705	SLIRP	0.250559	0.209159	No	0.522602	0.0156028	up	0.422085	0.0370794	up	0.292007	0.164971	no	-0.104902	0.626872	no
ENSG00000070018	LRP6	-0.276544	0.540277	No	-1.15974	9.45e-05	down	-0.968968	0.00491371	down	-0.861962	0.0700035	no	0.181629	0.627283	no
ENSG00000184860	SDR42E1	-0.767848	0.0965547	No	-1.12626	0.0168368	down	-0.872527	0.0297601	down	-0.334829	0.549658	no	0.246009	0.628364	no
ENSG00000128694	OSGEPL1	-0.162644	0.304132	No	-0.400809	0.0184514	down	-0.315867	0.0310061	down	-0.21768	0.205786	no	0.0784958	0.63014	no
ENSG00000196975	ANXA4	0.0122804	0.945123	No	0.312108	0.0496166	up	0.401289	0.0468922	up	0.319981	0.0222614	up	0.0832678	0.632478	no
ENSG00000289721	PYDC5	-1.50765	0.0819795	No	-2.09537	0.00345822	down	-1.55676	0.0325929	down	-0.543879	0.675529	no	0.524136	0.635831	no
ENSG00000113749	HRH2	0.437842	0.0598771	No	0.619089	0.00142403	up	0.776076	0.00698861	up	0.207648	0.433295	no	0.148051	0.635965	no
ENSG00000125245	GPR18	-0.124879	0.481396	No	-0.532716	0.0312517	down	-0.402478	0.0337192	down	-0.386514	0.132511	no	0.125335	0.636459	no
ENSG00000068024	HDAC4	0.125757	0.187254	No	0.341646	0.00991257	up	0.43824	0.00836726	up	0.238743	0.100216	no	0.0897653	0.637235	no
ENSG00000064763	FAR2	0.266663	0.166086	No	0.58272	0.000684946	up	0.491697	0.0084766	up	0.337627	0.0937871	no	-0.094874	0.638016	no
ENSG00000087266	SH3BP2	0.522619	0.0644127	No	0.753109	0.00988436	up	0.655908	0.025266	up	0.254886	0.197262	no	-0.102613	0.639974	no
ENSG00000291316	ENSG00000291316	0.114138	0.528137	No	0.296851	0.0390928	up	0.389731	0.0435733	up	0.203993	0.24596	no	0.085203	0.643268	no
ENSG00000178404	CEP295NL	0.0129436	0.960625	No	0.673918	0.0117082	up	0.572465	0.00676611	up	0.684369	0.0123774	up	-0.106468	0.644737	no
ENSG00000122861	PLAU	0.990117	0.145025	No	1.45004	0.0411532	up	1.71462	0.00389605	up	0.488437	0.432342	no	0.257529	0.645758	no
ENSG00000183691	NOG	-0.495148	0.229509	No	-1.82716	4.03e-05	down	-1.62326	1.01e-05	down	-1.30929	0.00497403	down	0.195077	0.649551	no
ENSG00000198690	FAN1	-0.130516	0.300415	No	-0.350476	0.000318343	down	-0.402107	0.00272977	down	-0.198618	0.111199	no	-0.057267	0.660591	no
ENSG00000164815	ORC5	-0.199989	0.104389	No	-0.39748	0.0229917	down	-0.311363	0.0167377	down	-0.178612	0.318311	no	0.0813837	0.66104	no
ENSG00000117322	CR2	-0.653837	0.124405	No	-0.897552	0.0203874	down	-0.720414	0.00761705	down	-0.220986	0.664001	no	0.168395	0.666107	no
ENSG00000205213	LGR4	-0.49346	0.124058	No	-0.664832	0.00733683	down	-0.568922	0.0246701	down	-0.150604	0.609199	no	0.0901898	0.666864	no
ENSG00000073331	ALPK1	-0.282861	0.202123	No	0.384657	0.0241489	up	0.4813	0.00793931	up	0.692366	0.00444355	up	0.0919173	0.667442	no
ENSG00000158470	B4GALT5	0.138927	0.528745	No	0.554466	0.00390211	up	0.66077	0.00146142	up	0.43719	0.0788032	no	0.102298	0.668474	no
ENSG00000242550	SERPINB10	0.36567	0.474116	No	1.54632	0.00258429	up	1.26916	0.0262422	up	1.19635	0.0518356	no	-0.2798	0.67076	no
ENSG00000091879	ANGPT2	4.6225	1	No	6.08115	7.03e-06	up	5.32795	5.99e-05	up	1.47178	0.424901	no	-0.757686	0.671069	no
ENSG00000116337	AMPD2	0.309606	0.131439	No	0.364899	0.0203143	up	0.466598	0.0335401	up	0.0800301	0.696845	no	0.0935126	0.671135	no
ENSG00000115828	QPCT	0.568674	0.060642	No	0.824102	0.00136777	up	0.951224	0.000960236	up	0.273676	0.358147	no	0.120177	0.671879	no
ENSG00000161944	ASGR2	0.56523	0.0520752	No	0.677372	0.000838912	up	0.849318	0.034481	up	0.135472	0.602348	no	0.161565	0.675648	no
ENSG00000196981	WDR5B	-0.324392	0.053651	No	-0.46195	0.00379822	down	-0.381503	0.0144393	down	-0.118526	0.526345	no	0.0749514	0.675934	no
ENSG00000172244	C5orf34	-0.413406	0.0889297	No	-0.674137	0.00777446	down	-0.798897	0.00263389	down	-0.241987	0.386692	no	-0.126408	0.678379	no
ENSG00000090612	ZNF268	-0.454341	0.069864	No	-0.514236	0.0444999	down	-0.616899	0.0165298	down	-0.0420714	0.866315	no	-0.10653	0.681381	no
ENSG00000116771	AGMAT	0.0874617	0.806032	No	-0.680253	0.00970069	down	-0.546488	0.0402156	down	-0.749965	0.0532259	no	0.125594	0.682542	no
ENSG00000174718	RESF1	-0.148932	0.504784	No	-0.46007	0.036509	down	-0.557497	0.0333808	down	-0.293229	0.150429	no	-0.101486	0.68366	no
ENSG00000138442	WDR12	-0.17044	0.121684	No	-0.290176	0.0429514	down	-0.345263	0.00658206	down	-0.099125	0.459621	no	-0.0604157	0.68808	no
ENSG00000115271	GCA	0.336757	0.158441	No	0.611603	0.0117845	up	0.526551	0.0387323	up	0.293477	0.146543	no	-0.0911765	0.688837	no
ENSG00000288658	ENSG00000288658	2.27381	0.402526	No	3.88555	0.0285878	up	4.35944	0.0126918	up	1.63972	0.202603	no	0.46044	0.694508	no
ENSG00000197208	SLC22A4	0.364293	0.193128	No	1.02216	0.000135358	up	1.11408	7.43e-06	up	0.67979	0.00724096	up	0.0871612	0.697812	no
ENSG00000103528	SYT17	0.545939	0.154504	No	0.968919	0.00205371	up	1.10714	0.00204597	up	0.445671	0.231563	no	0.134607	0.700678	no
ENSG00000138119	MYOF	0.0287358	0.927898	No	0.846444	0.00546748	up	0.73504	0.0227655	up	0.842264	0.00359171	up	-0.115302	0.701138	no
ENSG00000117519	CNN3	-0.386393	0.305624	No	-1.18303	0.0120261	down	-0.964076	0.0328248	down	-0.772814	0.105854	no	0.211527	0.70221	no
ENSG00000243667	DNAAF10	-0.277579	0.0543255	No	-0.48974	0.0309886	down	-0.394847	0.0216586	down	-0.192029	0.384005	no	0.0905158	0.703768	no
ENSG00000161813	LARP4	-0.101636	0.509075	No	-0.466503	0.000245168	down	-0.410603	0.000515524	down	-0.342376	0.0329653	down	0.0493319	0.704947	no
ENSG00000170298	LGALS9B	-0.246701	0.551915	No	-1.24549	0.00192527	down	-1.42081	0.00213327	down	-0.978435	0.0197146	down	-0.181061	0.705057	no
ENSG00000107736	CDH23	0.42427	0.096882	No	0.534521	0.0319498	up	0.63806	0.0210371	up	0.136869	0.561025	no	0.0971145	0.709961	no
ENSG00000102984	ZNF821	0.281229	0.110513	No	0.329507	0.0378501	up	0.407884	0.037291	up	0.0695954	0.69325	no	0.0719193	0.710281	no
ENSG00000187257	RSBN1L	-0.223583	0.0754055	No	-0.258031	0.0127903	down	-0.210704	0.0369199	down	-0.013992	0.917579	no	0.0422622	0.719938	no
ENSG00000163002	NUP35	-0.185407	0.19412	No	-0.338198	0.0122028	down	-0.391609	0.0122173	down	-0.131739	0.392052	no	-0.0582304	0.728648	no
ENSG00000137834	SMAD6	0.850342	0.0553012	No	1.74855	0.000197352	up	1.61257	1.24e-06	up	0.922867	0.0616418	no	-0.142925	0.730204	no
ENSG00000140675	SLC5A2	-0.59842	0.134302	No	-0.686048	0.0245939	down	-0.810716	0.0171042	down	-0.0709956	0.871477	no	-0.130173	0.731532	no
ENSG00000148358	GPR107	0.139406	0.111863	No	0.212921	0.00779797	up	0.257077	0.0286525	up	0.0949171	0.231792	no	0.0386255	0.732789	no
ENSG00000152213	ARL11	0.240064	0.45233	No	0.532205	0.0353866	up	0.631693	0.0273984	up	0.318192	0.301426	no	0.0926025	0.737855	no
ENSG00000165923	AGBL2	-0.439355	0.0668147	No	-0.553262	0.00933829	down	-0.471814	0.0451117	down	-0.0931863	0.688265	no	0.0762881	0.738243	no
ENSG00000128918	ALDH1A2	0.732823	0.148516	No	1.03875	0.0113544	up	0.925594	0.0349191	up	0.331361	0.452973	no	-0.120787	0.74462	no
ENSG00000159658	EFCAB14	0.192051	0.173374	No	0.268098	0.0181688	up	0.319978	0.0114639	up	0.098185	0.524269	no	0.0451678	0.744856	no
ENSG00000164543	STK17A	-0.0534839	0.705716	No	-0.452757	0.0063118	down	-0.389659	0.00516507	down	-0.378986	0.0360226	down	0.0578167	0.746168	no
ENSG00000159885	ZNF222	-0.402242	0.118832	No	-0.594294	0.0276731	down	-0.496631	0.0432122	down	-0.172104	0.563574	no	0.0931233	0.746735	no
ENSG00000179941	BBS10	-0.352325	0.100628	No	-0.495879	0.0455383	down	-0.417165	0.0174621	down	-0.124086	0.629134	no	0.0729867	0.751323	no
ENSG00000128274	A4GALT	-2.43873	0.0730133	No	-3.70704	0.0139665	down	-2.85507	0.0372002	down	-1.22558	0.643475	no	0.863243	0.752577	no
ENSG00000165097	KDM1B	0.301926	0.192942	No	0.595135	0.000669326	up	0.523635	0.0257154	up	0.31796	0.175178	no	-0.0756583	0.754907	no
ENSG00000256771	ZNF253	-0.344948	0.101672	No	-0.560151	0.006995	down	-0.491272	0.00756734	down	-0.194232	0.395522	no	0.0633863	0.758186	no
ENSG00000198223	CSF2RA	0.281695	0.273357	No	0.474005	0.00386289	up	0.542762	0.00793182	up	0.218291	0.394241	no	0.0624586	0.763036	no
ENSG00000198598	MMP17	0.488888	0.0795895	No	0.692704	0.0203043	up	0.805149	0.0157633	up	0.227794	0.479287	no	0.105415	0.77308	no
ENSG00000138615	CILP	-0.601256	0.103868	No	-1.09654	0.0375998	down	-1.27328	0.000358878	down	-0.48225	0.428909	no	-0.176564	0.773272	no
ENSG00000106484	MEST	0.700741	0.0781691	No	-0.673477	0.0254792	down	-0.736319	0.0133962	down	-1.35122	0.000249044	down	-0.0707436	0.774498	no
ENSG00000134250	NOTCH2	0.281094	0.0839529	No	0.494763	0.00104041	up	0.447589	0.0133957	up	0.236269	0.154525	no	-0.0531623	0.775416	no
ENSG00000095002	MSH2	-0.265014	0.128868	No	-0.465166	0.00830751	down	-0.405353	0.0240115	down	-0.181989	0.318599	no	0.0531326	0.77779	no
ENSG00000175197	DDIT3	0.359824	0.0918526	No	0.518051	0.0321619	up	0.601975	0.0409075	up	0.177463	0.354011	no	0.0800457	0.778103	no
ENSG00000170525	PFKFB3	0.586536	0.0920673	No	0.719071	0.0370603	up	0.633663	0.0451361	up	0.152653	0.665028	no	-0.0895335	0.781674	no
ENSG00000031081	ARHGAP31	0.222442	0.129032	No	0.403536	0.000355109	up	0.362717	0.034521	up	0.203344	0.148814	no	-0.0467997	0.782614	no
ENSG00000112874	NUDT12	-0.440732	0.157307	No	-0.772139	0.00910914	down	-0.857586	0.000900724	down	-0.314842	0.39703	no	-0.0891205	0.78753	no
ENSG00000255274	SMIM35	0.548271	0.153042	No	0.84262	0.0195253	up	0.763274	0.0407687	up	0.316756	0.325532	no	-0.0838429	0.787966	no
ENSG00000065882	TBC1D1	0.20765	0.194978	No	0.278508	0.0156714	up	0.319801	0.024171	up	0.0933536	0.530116	no	0.0353174	0.789216	no
ENSG00000100226	GTPBP1	0.348588	0.0654997	No	0.430068	0.0417726	up	0.3756	0.04639	up	0.104095	0.641949	no	-0.0594407	0.790728	no
ENSG00000083635	NUFIP1	-0.171639	0.365495	No	-0.383954	0.0372819	down	-0.424832	0.0199786	down	-0.192425	0.289952	no	-0.0460264	0.792073	no
ENSG00000148950	IMMP1L	-0.178355	0.200788	No	-0.411036	0.0128174	down	-0.360464	0.0110547	down	-0.213295	0.202145	no	0.0452142	0.792346	no
ENSG00000154134	ROBO3	-0.144995	0.529324	No	-0.946844	0.000206294	down	-0.863096	0.000467104	down	-0.781629	0.0062269	down	0.079483	0.794562	no
ENSG00000176788	BASP1	0.164193	0.575687	No	0.583346	0.0125058	up	0.548056	0.0199421	up	0.439052	0.0698509	no	-0.041063	0.796704	no
ENSG00000256229	ZNF486	-0.218363	0.216884	No	-0.451171	0.0429607	down	-0.509176	0.0499807	down	-0.212013	0.26686	no	-0.0657559	0.806941	no
ENSG00000140332	TLE3	0.0552884	0.682104	No	0.470265	0.000183548	up	0.441362	0.001909	up	0.436444	0.00127605	up	-0.034548	0.811392	no
ENSG00000163171	CDC42EP3	0.296121	0.0515439	No	0.635	3.02e-05	up	0.683777	0.000420795	up	0.358725	0.018039	up	0.0431276	0.825091	no
ENSG00000145002	FAM86B2	-0.713115	0.363602	No	-1.63049	0.0206909	down	-1.41413	0.0384838	down	-0.900166	0.422176	no	0.222315	0.825284	no
ENSG00000168229	PTGDR	-0.31306	0.243967	No	-0.983292	0.000574846	down	-0.890977	0.018061	down	-0.650687	0.018245	down	0.0844383	0.825522	no
ENSG00000143226	FCGR2A	0.318643	0.189909	No	0.579159	0.043189	up	0.646034	0.019939	up	0.280503	0.252409	no	0.0616782	0.826727	no
ENSG00000160216	AGPAT3	0.153046	0.28797	No	0.37928	0.0127937	up	0.421392	0.0175839	up	0.249471	0.0701748	no	0.0364437	0.833624	no
ENSG00000183696	UPP1	0.138087	0.406654	No	0.296844	0.0484267	up	0.332583	0.0278601	up	0.179054	0.266735	no	0.0303179	0.837231	no
ENSG00000257923	CUX1	0.013835	0.893337	No	0.374141	0.00472266	up	0.346444	0.0268269	up	0.380755	0.0030722	up	-0.0335871	0.843238	no
ENSG00000111859	NEDD9	0.253941	0.257173	No	0.5603	0.00272442	up	0.609453	0.00599008	up	0.329617	0.150488	no	0.0453195	0.843984	no
ENSG00000134698	AGO4	0.0590936	0.679658	No	0.393844	0.00568124	up	0.372883	0.00478738	up	0.354631	0.013582	up	-0.0261497	0.847545	no
ENSG00000132357	CARD6	0.39804	0.0929886	No	0.505607	0.0224682	up	0.560244	0.0273686	up	0.127993	0.597746	no	0.0501815	0.848878	no
ENSG00000165895	ARHGAP42	-0.583156	0.221132	No	-1.1302	0.00126665	down	-1.05569	0.0019309	down	-0.53349	0.295567	no	0.0688252	0.856498	no
ENSG00000139364	TMEM132B	-0.554305	0.452294	No	-2.49207	0.011121	down	-2.20145	0.0479293	down	-1.92764	0.0561203	no	0.311983	0.858903	no
ENSG00000180787	ZFP3	-0.35457	0.0548973	No	-0.395422	0.0173513	down	-0.419015	0.00407733	down	-0.0196593	0.922131	no	-0.0293226	0.86108	no
ENSG00000173809	TDRD12	0.109312	0.89343	No	-1.49251	0.0392909	down	-1.36162	0.0233883	down	-1.59458	0.091036	no	0.128154	0.862814	no
ENSG00000258818	RNASE4	0.769447	0.139723	No	1.46019	0.00576108	up	1.40517	0.00670103	up	0.702993	0.0318471	up	-0.0594181	0.863084	no
ENSG00000198846	TOX	-0.368079	0.146948	No	-0.430295	0.0471964	down	-0.46599	0.0225388	down	-0.0448048	0.86684	no	-0.0383651	0.864386	no
ENSG00000112796	ENPP5	-0.441994	0.218485	No	-0.78954	0.00986741	down	-0.848895	0.0279026	down	-0.333572	0.311171	no	-0.0619465	0.865243	no
ENSG00000221970	OR2A1	-0.681777	0.203572	No	-1.21663	0.0255707	down	-1.33914	0.0332474	down	-0.517705	0.3933	no	-0.121096	0.867632	no
ENSG00000204923	FBXO48	-0.405951	0.0785347	No	-0.406326	0.0494384	down	-0.440266	0.0179425	down	0.0181959	0.94682	no	-0.0393165	0.868468	no
ENSG00000164125	GASK1B	0.309477	0.338332	No	0.927581	0.00370005	up	0.97613	0.00589001	up	0.637241	0.00141005	up	0.0435108	0.869377	no
ENSG00000074356	NCBP3	0.418154	0.0636532	No	0.447129	0.0438157	up	0.496284	0.0162014	up	0.0486498	0.863974	no	0.0438481	0.872583	no
ENSG00000163563	MNDA	0.269151	0.363776	No	0.646022	0.0136293	up	0.611243	0.00314773	up	0.398273	0.209938	no	-0.0387412	0.874584	no
ENSG00000165782	PIP4P1	0.214425	0.15424	No	0.264539	0.0390545	up	0.295802	0.0336781	up	0.0726406	0.662294	no	0.0242866	0.875253	no
ENSG00000187824	TMEM220	-0.55944	0.0615933	No	-0.750436	0.0151092	down	-0.796349	0.00535788	down	-0.17182	0.618342	no	-0.0526341	0.875405	no
ENSG00000167995	BEST1	0.630473	0.0688549	No	0.763259	0.000171663	up	0.802977	4.66e-06	up	0.158318	0.658956	no	0.0329355	0.875659	no
ENSG00000244165	P2RY11	0.535207	0.0980736	No	0.839303	0.00164182	up	0.809751	0.00123302	up	0.327069	0.301963	no	-0.0368584	0.876747	no
ENSG00000203797	DDO	0.895449	0.0689236	No	1.28201	0.0124828	up	1.21744	0.0087384	up	0.413243	0.38273	no	-0.0695341	0.877	no
ENSG00000143373	ZNF687	0.390402	0.0853703	No	0.657088	0.00149747	up	0.628286	0.00100535	up	0.291148	0.280914	no	-0.0366486	0.878634	no
ENSG00000141665	FBXO15	-0.634808	0.109429	No	-1.08932	0.0228007	down	-1.00378	0.0189405	down	-0.433915	0.394919	no	0.0794279	0.883397	no
ENSG00000056736	IL17RB	0.277834	0.627547	No	1.24205	0.0218629	up	1.1747	0.0294803	up	0.9881	0.0732286	no	-0.0752789	0.885871	no
ENSG00000261371	PECAM1	0.245545	0.207293	No	0.508227	0.0029433	up	0.54272	0.0128506	up	0.282613	0.132168	no	0.0302983	0.88937	no
ENSG00000099968	BCL2L13	0.328002	0.100184	No	0.586742	0.0011369	up	0.616738	0.000848416	up	0.280675	0.127837	no	0.0237239	0.88985	no
ENSG00000143674	MAP3K21	0.127705	0.56122	No	0.522119	0.0162343	up	0.496997	0.0139889	up	0.414837	0.0779213	no	-0.029465	0.894189	no
ENSG00000143549	TPM3	0.275562	0.123082	No	0.433283	0.00696362	up	0.455969	0.00730838	up	0.178523	0.214591	no	0.0176621	0.897418	no
ENSG00000146592	CREB5	-0.00294881	0.99298	No	0.696661	0.0026284	up	0.729285	0.00193531	up	0.725097	0.0246345	up	0.0263525	0.902609	no
ENSG00000157554	ERG	1.16621	0.0581612	No	2.02034	0.0021812	up	1.91666	0.00138001	up	0.871043	0.240895	no	-0.104466	0.902904	no
ENSG00000189144	ZNF573	-0.517414	0.0649049	No	-0.496612	0.00104765	down	-0.516975	0.013643	down	0.0420071	0.881438	no	-0.0256261	0.903146	no
ENSG00000124201	ZNFX1	0.187377	0.132939	No	0.378187	0.0101699	up	0.363519	0.00365438	up	0.214785	0.21182	no	-0.0203553	0.906028	no
ENSG00000183742	MACC1	-0.538845	0.0857972	No	-0.862303	0.00945076	down	-0.814309	0.016761	down	-0.303666	0.367711	no	0.0430504	0.906243	no
ENSG00000163162	RNF149	0.255008	0.0591473	No	0.463881	0.00534636	up	0.450168	0.000143433	up	0.230006	0.173514	no	-0.0189264	0.906798	no
ENSG00000157869	RAB28	-0.11193	0.519114	No	-0.446179	0.0199059	down	-0.467962	0.0330663	down	-0.316203	0.0527338	no	-0.0254922	0.90701	no
ENSG00000165113	GKAP1	-0.20049	0.27213	No	-0.451067	0.0277534	down	-0.41843	0.016748	down	-0.232862	0.333586	no	0.0273301	0.907479	no
ENSG00000270011	ZNF559-ZNF177	-0.247717	0.486106	No	-0.707208	0.0313327	down	-0.739781	0.00921101	down	-0.444617	0.263093	no	-0.0382319	0.907515	no
ENSG00000160584	SIK3	-0.075566	0.53233	No	0.260949	0.0233908	up	0.252346	0.0174165	up	0.357041	0.010718	up	-0.0143436	0.910634	no
ENSG00000150337	FCGR1A	0.870694	1	No	1.24323	0.00298051	up	1.29611	0.00214796	up	0.396656	0.384079	no	0.0461882	0.912719	no
ENSG00000107554	DNMBP	0.0399937	0.677786	No	0.252257	0.0351045	up	0.274997	0.0478119	up	0.23407	0.0605177	no	0.0167388	0.91415	no
ENSG00000148344	PTGES	1.16991	0.124548	No	1.6298	0.0466276	up	1.56699	0.0367833	up	0.474118	0.448768	no	-0.0656828	0.916554	no
ENSG00000120057	SFRP5	-1.40794	0.0700117	No	-2.9237	0.000452723	down	-2.99924	6.82e-05	down	-1.49216	0.0722394	no	-0.0856706	0.918621	no
ENSG00000135960	EDAR	-0.703744	0.0605089	No	-1.01619	0.00352491	down	-0.980208	0.00128122	down	-0.293103	0.424126	no	0.0295305	0.918978	no
ENSG00000119608	PROX2	-0.184214	0.699472	No	-0.891707	0.0268431	down	-0.848788	0.01905	down	-0.69211	0.195539	no	0.0403523	0.926159	no
ENSG00000165102	HGSNAT	0.334938	0.0830531	No	0.316873	0.00423996	up	0.333149	0.0141771	up	0.00408062	0.981977	no	0.0101553	0.927414	no
ENSG00000107262	BAG1	0.238502	0.151465	No	0.370534	0.0190791	up	0.362085	0.0319947	up	0.153283	0.322024	no	-0.0144707	0.928017	no
ENSG00000172716	SLFN11	0.156397	0.35352	No	0.419949	0.013516	up	0.409154	0.00998856	up	0.28328	0.119699	no	-0.015476	0.930468	no
ENSG00000127507	ADGRE2	0.435978	0.105355	No	0.686625	1.2e-05	up	0.674672	0.000277498	up	0.277011	0.320318	no	-0.0179843	0.93079	no
ENSG00000224420	ADM5	-0.540652	0.211591	No	-1.07624	0.0218762	down	-1.02528	0.0313828	down	-0.515166	0.249992	no	0.042843	0.931839	no
ENSG00000204611	ZNF616	-0.468454	0.0563964	No	-0.568183	0.0264169	down	-0.589907	0.00996803	down	-0.0794694	0.803192	no	-0.0252706	0.934622	no
ENSG00000198734	F5	0.00451271	0.986186	No	0.586485	0.0039028	up	0.571159	0.0489168	up	0.600742	0.0223851	up	-0.0231705	0.936915	no
ENSG00000243414	TICAM2	-0.328561	0.64305	No	-1.54758	0.000360343	down	-1.51507	0.000547483	down	-1.18449	0.0244889	down	0.0226931	0.939037	no
ENSG00000197506	SLC28A3	0.476392	0.247591	No	1.06238	0.0258051	up	1.02188	0.0435754	up	0.598192	0.234302	no	-0.0426792	0.940874	no
ENSG00000099985	OSM	0.492856	0.119329	No	1.0218	0.00179572	up	1.00413	0.000818581	up	0.548294	0.0661408	no	-0.0211548	0.94131	no
ENSG00000008128	CDK11A	0.0278315	0.922491	No	0.455532	0.0465322	up	0.445439	0.0443764	up	0.449412	0.100243	no	-0.014553	0.942713	no
ENSG00000154217	PITPNC1	-0.178652	0.511367	No	-0.509606	0.00360382	down	-0.522339	0.0434818	down	-0.312452	0.219267	no	-0.016628	0.945007	no
ENSG00000235568	NFAM1	0.090173	0.791374	No	0.730946	0.000933791	up	0.720199	0.000356524	up	0.664007	0.0637181	no	-0.0160804	0.946233	no
ENSG00000187862	TTC24	-0.544275	0.0863636	No	-0.900502	0.000941147	down	-0.877534	0.00926086	down	-0.332407	0.182609	no	0.0185287	0.947379	no
ENSG00000101236	RNF24	0.150977	0.324112	No	0.444578	0.000472566	up	0.460419	0.00136388	up	0.31739	0.0520007	no	0.0102475	0.948505	no
ENSG00000173258	ZNF483	-0.375923	0.113514	No	-0.428086	0.00036131	down	-0.434504	0.0339033	down	-0.0328542	0.889931	no	-0.0126897	0.950075	no
ENSG00000151948	GLT1D1	0.319838	0.0527772	No	0.853516	0.000126645	up	0.874244	2.11e-07	up	0.557582	0.0201725	up	0.0145181	0.952226	no
ENSG00000288706	ENSG00000288706	0.468368	0.555523	No	0.959979	0.000914082	up	0.981102	0.00166399	up	0.521065	0.504931	no	0.0173886	0.952512	no
ENSG00000100154	TTC28	-0.455376	0.061642	No	-0.875685	0.000388458	down	-0.855258	5.55e-05	down	-0.397696	0.196954	no	0.0162019	0.955347	no
ENSG00000088179	PTPN4	-0.465838	0.0728249	No	-0.706905	0.00525552	down	-0.690218	0.00240629	down	-0.223871	0.394214	no	0.0129761	0.95575	no
ENSG00000131831	RAI2	-0.642587	0.330349	No	-1.46526	0.0459068	down	-1.50345	0.0374056	down	-0.781322	0.415188	no	-0.055573	0.95968	no
ENSG00000009844	VTA1	-0.255416	0.22616	No	-0.382498	0.0201543	down	-0.386295	0.0276448	down	-0.108334	0.594108	no	-0.00825908	0.96125	no
ENSG00000140612	SEC11A	0.307481	0.0826904	No	0.309731	0.032706	up	0.321131	0.0279986	up	0.0231663	0.891108	no	0.00586467	0.966236	no
ENSG00000048828	FAM120A	0.121881	0.136088	No	0.273957	0.00662098	up	0.287442	0.0344692	up	0.174382	0.118624	no	0.00618386	0.966723	no
ENSG00000188786	MTF1	0.135459	0.291392	No	0.3561	0.00108144	up	0.36771	0.0149272	up	0.242456	0.0680335	no	0.00620418	0.968373	no
ENSG00000033170	FUT8	-0.23222	0.0715505	No	-0.353599	0.00338912	down	-0.342051	0.0101515	down	-0.101538	0.496305	no	0.00571532	0.970007	no
ENSG00000112679	DUSP22	0.456945	0.0687731	No	0.737866	0.00015191	up	0.748965	0.00355893	up	0.298842	0.144384	no	0.00710252	0.974039	no
ENSG00000131238	PPT1	0.442907	0.0907212	No	0.522345	0.0116352	up	0.533708	0.0239922	up	0.101104	0.627069	no	0.00545942	0.975564	no
ENSG00000275395	FCGBP	-0.126815	0.696111	No	-0.970393	0.00109953	down	-0.953502	0.0134256	down	-0.821581	0.0050516	down	0.00936645	0.979557	no
ENSG00000134827	TCN1	0.487083	0.237482	No	1.19232	0.0349716	up	1.21019	0.015222	up	0.716878	0.330384	no	0.0197045	0.980707	no
ENSG00000142798	HSPG2	-0.289062	0.408058	No	-0.939711	0.0146731	down	-0.921565	0.0103467	down	-0.628763	0.0839224	no	0.00856833	0.981668	no
ENSG00000170122	FOXD4	-0.541869	0.382632	No	-2.20978	0.0162878	down	-2.17164	0.00381279	down	-1.65342	0.0729516	no	0.0263818	0.981928	no
ENSG00000108924	HLF	0.165921	0.557511	No	0.798207	0.000343792	up	0.810639	0.0112225	up	0.653076	0.0177993	up	0.00516395	0.986802	no
ENSG00000163520	FBLN2	-0.715031	0.191484	No	-1.31523	0.000501494	down	-1.30433	0.00166441	down	-0.57567	0.284371	no	0.00336731	0.993067	no
ENSG00000152291	TGOLN2	0.169934	0.0754945	No	0.291828	0.000818655	up	0.296891	0.0175789	up	0.142165	0.0736475	no	-0.000984715	0.993127	no
ENSG00000121542	SEC22A	-0.074785	0.623794	No	-0.37226	0.00993825	down	-0.368527	0.0124164	down	-0.278347	0.0667277	no	-0.00116167	0.993825	no
ENSG00000196502	SULT1A1	0.396271	0.242799	No	0.942537	0.0227803	up	0.946409	0.00549178	up	0.575399	0.156519	no	-0.00241072	0.99526	no
ENSG00000130943	PKDREJ	-0.817865	0.0762633	No	-1.5292	0.0201288	down	-1.5145	0.0114237	down	-0.692011	0.295394	no	0.00244182	0.997644	no
ENSG00000196411	EPHB4	-0.0579248	0.875287	No	-0.726152	0.0086555	down	-0.717968	0.00902928	down	-0.649089	0.0733064	no	0.000634209	0.998016	no
ENSG00000257529	RPL36A-HNRNPH2	0.268208	0.891293	No	-9.02673	0.00265478	down	-9.09408	0.00246555	down	-9.25424	2.44e-06	down	NA	NA	NA
ENSG00000135374	ELF5	-1.06956	0.464851	No	-3.88	0.0298037	down	-3.94751	0.0261805	down	-2.75983	0.364576	no	NA	NA	NA
ENSG00000165805	C12orf50	-1.47299	0.320004	No	-3.79519	0.0361024	down	-3.86612	0.0318593	down	-2.31416	0.449268	no	NA	NA	NA
