# Supplementary material for: Identification of GATA2-AS1- hsa-miR-125b-5p-PLAU ceRNA regulatory network as novel biomarkers for prethrombotic state in patients with coronary artery disease
Source: Research Square preprint supplement (doi:10.21203/rs.3.rs-7671890/v1), 2026-01-29
Supplement: Supplementary file 8 [file c6342675d6888a8f97387852.xlsx]

## Sheet: Results of ceRNA network topolo
Supplementary Table 9. The topology analysis of ceRNA network
name	Degree	BetweennessCentrality	ClosenessCentrality	Eccentricity	EdgeCount	Stress	type
hsa-miR-185-3p	104	0.317713	0.45576	3	104	1110510	miRNA
hsa-miR-142-5p	88	0.162036	0.432647	3	88	793588	miRNA
hsa-miR-23b-3p	79	0.143045	0.420647	3	79	668220	miRNA
hsa-miR-7-5p	74	0.118821	0.414264	3	74	599728	miRNA
hsa-miR-576-3p	73	0.170564	0.413011	3	73	662266	miRNA
hsa-miR-582-3p	68	0.0953047	0.406855	3	68	499842	miRNA
hsa-miR-21-5p	61	0.0867412	0.39854	3	61	413450	miRNA
hsa-miR-125b-5p	56	0.0977538	0.392806	3	56	433216	miRNA
hsa-miR-760	56	0.0770287	0.392806	3	56	384138	miRNA
hsa-miR-197-3p	53	0.0747072	0.389444	3	53	365922	miRNA
hsa-miR-2115-3p	37	0.0380365	0.372442	3	37	172484	miRNA
hsa-miR-3909	24	0.0200141	0.359684	3	24	82314	miRNA
hsa-miR-3614-5p	19	0.013797	0.355007	3	19	46378	miRNA
SLC5A3	11	0.017829	0.479789	4	11	113226	mRNA
TGOLN2	11	0.0214056	0.504621	4	11	135484	mRNA
NOTCH2	10	0.0179176	0.495463	4	10	110732	mRNA
RYBP	9	0.00782305	0.411765	4	9	51628	mRNA
KIF1B	9	0.0127729	0.468268	4	9	85540	mRNA
B4GALT5	9	0.0105915	0.446809	4	9	75250	mRNA
HIP1	8	0.0078476	0.425897	4	8	50218	mRNA
SH3D19	8	0.0114303	0.457286	4	8	58738	mRNA
FGD4	8	0.00826583	0.424572	4	8	45784	mRNA
SETD7	8	0.0132517	0.481481	4	8	85310	mRNA
CUX1	7	0.00877324	0.443902	4	7	52722	mRNA
NSD2	7	0.00412909	0.385049	4	7	25188	mRNA
P3H2	7	0.00401034	0.392806	4	7	30692	mRNA
PPP1R3B	7	0.00860773	0.45124	4	7	57498	mRNA
NUDT16	7	0.0074725	0.438202	4	7	45948	mRNA
JAG1	7	0.00846257	0.446809	4	7	53256	mRNA
MTF1	7	0.00515695	0.410526	4	7	39818	mRNA
SH3BP2	7	0.0101855	0.460371	4	7	59754	mRNA
GPR107	7	0.00665929	0.421947	4	7	44552	mRNA
PTPN4	7	0.00596787	0.402062	4	7	32356	mRNA
LARP4	7	0.00610791	0.419355	4	7	42550	mRNA
CREB5	7	0.00654872	0.419355	4	7	43582	mRNA
LGR4	7	0.00608455	0.420647	4	7	41786	mRNA
LRP11	7	0.0060567	0.41807	4	7	41764	mRNA
TRAK1	6	0.0063991	0.428571	4	6	38942	mRNA
AGPAT3	6	0.00637124	0.432647	4	6	40210	mRNA
SPTSSB	6	0.00309161	0.391679	4	6	27802	mRNA
CDC42EP3	6	0.00686554	0.438202	4	6	48438	mRNA
GNS	6	0.00287068	0.382889	4	6	22804	mRNA
LRP6	6	0.00367957	0.39854	4	6	30420	mRNA
FRMD8	6	0.00297749	0.382889	4	6	22186	mRNA
RNF149	6	0.00784122	0.443902	4	6	48002	mRNA
TNS3	6	0.00471696	0.39854	4	6	27464	mRNA
DLC1	6	0.00483873	0.405646	4	6	29184	mRNA
FAM169A	6	0.00815059	0.448276	4	6	46466	mRNA
TBC1D2B	5	0.00205751	0.367429	4	5	14050	mRNA
TPM3	5	0.00213656	0.363515	4	5	13246	mRNA
GTPBP10	5	0.00375097	0.393939	4	5	19218	mRNA
MAFK	5	0.00444402	0.416794	4	5	28906	mRNA
MTMR3	5	0.00204831	0.363515	4	5	15358	mRNA
RNF24	5	0.00451697	0.409295	4	5	27684	mRNA
PPT1	5	0.00235494	0.371429	4	5	15952	mRNA
FAM120A	5	0.00188928	0.372442	4	5	15590	mRNA
DNMBP	5	0.00432183	0.410526	4	5	26276	mRNA
MAP3K21	5	0.00204862	0.380753	4	5	19236	mRNA
AGO4	5	0.00201119	0.371429	4	5	15264	mRNA
EFCAB14	5	0.00270058	0.389444	4	5	21608	mRNA
NR6A1	5	0.00660198	0.435407	4	5	36006	mRNA
PITPNC1	5	0.00327259	0.393939	4	5	22624	mRNA
TMPPE	5	0.00544534	0.42723	4	5	33914	mRNA
RBM47	5	0.00347525	0.400881	4	5	25128	mRNA
NDC1	5	0.00334475	0.390558	4	5	20590	mRNA
ZFP3	5	0.00570251	0.432647	4	5	37388	mRNA
NAMPT	5	0.00301752	0.391679	4	5	22712	mRNA
LONRF1	5	0.00305077	0.386139	4	5	21904	mRNA
BCL2L13	4	0.00288019	0.390558	4	4	17566	mRNA
SLFN11	4	0.00305506	0.39738	4	4	19612	mRNA
MICU1	4	0.00125155	0.351351	4	4	9716	mRNA
LIMK2	4	0.00296875	0.381818	4	4	12656	mRNA
ZNF746	4	0.00295382	0.389444	4	4	16240	mRNA
NCBP3	4	0.00121048	0.355932	4	4	9004	mRNA
PLAU	4	0.00140679	0.355007	4	4	9662	mRNA
TBC1D31	4	0.00115664	0.348659	4	4	8194	mRNA
GTPBP1	4	0.00353087	0.396226	4	4	20310	mRNA
PIGN	4	0.00158824	0.360634	4	4	11704	mRNA
PSRC1	4	0.00322691	0.402062	4	4	20620	mRNA
SYK	4	0.00117249	0.355932	4	4	9508	mRNA
BAG1	4	0.00258923	0.388336	4	4	16458	mRNA
PFKFB3	4	0.00274398	0.386139	4	4	17348	mRNA
BASP1	4	0.00118183	0.365462	4	4	11070	mRNA
MBD2	4	0.00305395	0.406855	4	4	22444	mRNA
WDHD1	4	0.00112025	0.336621	4	4	5530	mRNA
NUFIP1	4	0.0034068	0.400881	4	4	18742	mRNA
ZNF687	4	0.003283	0.405646	4	4	20736	mRNA
BNIP3	4	0.00394066	0.410526	4	4	22974	mRNA
PLXNA2	4	0.00177012	0.36255	4	4	10616	mRNA
ARHGAP31	4	0.00192035	0.369418	4	4	13268	mRNA
PLXNA4	4	0.00381982	0.399707	4	4	18492	mRNA
RELT	4	0.00407719	0.415525	4	4	24122	mRNA
NEDD9	4	0.00215879	0.364486	4	4	11760	mRNA
TICAM2	4	0.00464032	0.42723	4	4	28136	mRNA
SLC8A1	4	0.00368903	0.396226	4	4	19486	mRNA
HGSNAT	4	0.00192035	0.369418	4	4	13268	mRNA
F2RL1	4	0.00187326	0.369418	4	4	13310	mRNA
WDR5B	4	0.00200736	0.361589	4	4	11978	mRNA
LINC01128	4	0.00136711	0.341677	4	4	6792	lncRNA
CD248	3	0.00171721	0.364486	4	3	9364	mRNA
HSPG2	3	0.00171721	0.364486	4	3	9364	mRNA
GORASP1	3	0.00188561	0.373461	4	3	11150	mRNA
SMAD6	3	0.00188561	0.373461	4	3	11150	mRNA
PTGES	3	0.000591	0.341677	4	3	5160	mRNA
NUDT12	3	0.000617	0.346008	4	3	5838	mRNA
TOM1	3	0.00155018	0.348659	4	3	6610	mRNA
ORC5	3	0.000779	0.331713	4	3	4746	mRNA
SIPA1L2	3	0.000541	0.32852	4	3	3760	mRNA
CNN3	3	0.00049	0.336621	4	3	4454	mRNA
RPL36A-HNRNPH2	3	0.000644	0.312	4	3	2628	mRNA
COL6A1	3	0.000628	0.334149	4	3	4722	mRNA
LTBP3	3	0.00055	0.312	4	3	2764	mRNA
SLITRK4	3	0.00166422	0.368421	4	3	9068	mRNA
ENPP5	3	0.000636	0.352258	4	3	6372	mRNA
FAM114A1	3	0.00182931	0.386139	4	3	13040	mRNA
HMGXB4	3	0.000636	0.352258	4	3	6372	mRNA
NPTXR	3	0.00181718	0.380753	4	3	11824	mRNA
HDAC4	3	0.000497	0.333333	4	3	3446	mRNA
HNRNPLL	3	0.000699	0.352258	4	3	6356	mRNA
ZNF568	3	0.000699	0.352258	4	3	6356	mRNA
NOG	3	0.000497	0.333333	4	3	3446	mRNA
SDR42E1	3	0.000755	0.350449	4	3	6378	mRNA
KLF5	3	0.000699	0.352258	4	3	6356	mRNA
BBS10	3	0.000599	0.340824	4	3	4776	mRNA
MCU	3	0.000629	0.345133	4	3	5804	mRNA
SUV39H2	3	0.000699	0.352258	4	3	6356	mRNA
NFAM1	3	0.00291247	0.387234	4	3	14374	mRNA
JDP2	3	0.0011891	0.355932	4	3	8226	mRNA
MICAL2	3	0.00261637	0.392806	4	3	15128	mRNA
ALDH1A2	3	0.00138454	0.363515	4	3	9258	mRNA
MACC1	3	0.00103166	0.355007	4	3	7668	mRNA
WSCD1	3	0.00134554	0.354086	4	3	8276	mRNA
ADAMTSL4	3	0.00301523	0.39854	4	3	16194	mRNA
ZFP69B	3	0.00119599	0.347771	4	3	7506	mRNA
RRAGD	3	0.00261637	0.392806	4	3	15128	mRNA
ANXA4	3	0.001046	0.348659	4	3	6878	mRNA
ZNF616	3	0.00130828	0.363515	4	3	9338	mRNA
AC010336.1	3	0.000687	0.320799	4	3	3186	lncRNA
FTX	3	0.000563	0.335793	4	3	4188	lncRNA
LOXL1-AS1	3	0.00064	0.330909	4	3	3444	lncRNA
DENND5A	2	0.00117118	0.36255	4	2	6806	mRNA
SYT17	2	0.00117118	0.36255	4	2	6806	mRNA
VAV2	2	0.000809	0.339975	4	2	3968	mRNA
ALPK1	2	0.00117118	0.36255	4	2	6806	mRNA
MYOF	2	0.000689	0.340824	4	2	3980	mRNA
RSBN1L	2	0.000251	0.326165	4	2	2254	mRNA
A4GALT	2	0.000823	0.354086	4	2	5376	mRNA
ARHGEF4	2	0.000823	0.354086	4	2	5376	mRNA
TLE3	2	0.000254	0.314154	4	2	1806	mRNA
ZNF268	2	0.000192	0.314879	4	2	1586	mRNA
SERPING1	2	0.000823	0.354086	4	2	5376	mRNA
KCNQ1	2	0.000823	0.354086	4	2	5376	mRNA
ADAMTS6	2	0.000198	0.324614	4	2	1932	mRNA
RIN2	2	0.000198	0.324614	4	2	1932	mRNA
PIP4P1	2	0.000161	0.312	4	2	1392	mRNA
SIK3	2	0.000743	0.349552	4	2	4946	mRNA
PLEKHG4	2	0.000764	0.334969	4	2	3276	mRNA
IMMP1L	2	0.000169	0.308475	4	2	1064	mRNA
VTA1	2	0.000157	0.314154	4	2	1442	mRNA
KDM1B	2	0.000157	0.314154	4	2	1442	mRNA
GRAMD2B	2	0.000207	0.318553	4	2	1712	mRNA
SEC22A	2	0.00031	0.311288	4	2	1956	mRNA
ERG	2	0.000208	0.31058	4	2	1552	mRNA
MSH2	2	0.000168	0.295135	4	2	788	mRNA
PCED1B	2	0.000165	0.312715	4	2	1360	mRNA
PAK1	2	0.000668	0.33913	4	2	3666	mRNA
DENND2D	2	0.000668	0.33913	4	2	3666	mRNA
TOX	2	0.000234	0.331713	4	2	2376	mRNA
MEST	2	0.000169	0.314154	4	2	1136	mRNA
UBE2B	2	0.000172	0.307087	4	2	598	mRNA
TBC1D1	2	0.000182	0.309875	4	2	886	mRNA
ZNFX1	2	0.00025	0.326165	4	2	2200	mRNA
GCA	2	0.000234	0.331713	4	2	2376	mRNA
FBXO48	2	0.000909	0.361589	4	2	6230	mRNA
FUT8	2	0.000169	0.314154	4	2	1136	mRNA
IRF9	2	0.000234	0.331713	4	2	2376	mRNA
MPPED2	2	0.000231	0.326165	4	2	2068	mRNA
TCF7L2	2	0.000909	0.361589	4	2	6230	mRNA
FCGR2A	2	0.000909	0.361589	4	2	6230	mRNA
SLC16A3	2	0.00125217	0.353169	4	2	5762	mRNA
ZNF573	2	0.000416	0.316338	4	2	2252	mRNA
DUSP4	2	0.00125217	0.353169	4	2	5762	mRNA
ZNF749	2	0.00125217	0.353169	4	2	5762	mRNA
STK17A	2	0.000456	0.331713	4	2	3136	mRNA
SLC28A3	2	0.00125217	0.353169	4	2	5762	mRNA
TMEM132B	2	0.00125217	0.353169	4	2	5762	mRNA
CEP41	2	0.000399	0.325387	4	2	2668	mRNA
ZNF253	2	0.000592	0.333333	4	2	3626	mRNA
ANKRD22	2	0.00125217	0.353169	4	2	5762	mRNA
PVT1	2	0.000207	0.318553	4	2	1712	lncRNA
TTN-AS1	2	0.000254	0.317811	4	2	1874	lncRNA
THUMPD3-AS1	2	0.000261	0.334149	4	2	2576	lncRNA
LINC01278	2	0.000219	0.305028	4	2	1416	lncRNA
NOP14-AS1	2	0.000168	0.291355	4	2	690	lncRNA
PCBP1-AS1	2	0.000809	0.339975	4	2	3968	lncRNA
hsa_circ_0004688	2	0.000142	0.300992	4	2	1012	circRNA
ANGPT2	1	0	0.282316	4	1	0	mRNA
EPHB4	1	0	0.282316	4	1	0	mRNA
NUP35	1	0	0.282316	4	1	0	mRNA
ZNF559-ZNF177	1	0	0.282316	4	1	0	mRNA
DUSP22	1	0	0.296417	4	1	0	mRNA
OSGEPL1	1	0	0.296417	4	1	0	mRNA
P2RY11	1	0	0.296417	4	1	0	mRNA
RFX2	1	0	0.296417	4	1	0	mRNA
DDIT3	1	0	0.296417	4	1	0	mRNA
F5	1	0	0.313433	4	1	0	mRNA
GPATCH1	1	0	0.313433	4	1	0	mRNA
MOCS1	1	0	0.313433	4	1	0	mRNA
FAM151B	1	0	0.313433	4	1	0	mRNA
MECR	1	0	0.313433	4	1	0	mRNA
PKDREJ	1	0	0.313433	4	1	0	mRNA
KLHDC7B	1	0	0.313433	4	1	0	mRNA
KLRC4	1	0	0.313433	4	1	0	mRNA
WNT11	1	0	0.313433	4	1	0	mRNA
LILRB4	1	0	0.313433	4	1	0	mRNA
LNP1	1	0	0.313433	4	1	0	mRNA
MMP17	1	0	0.313433	4	1	0	mRNA
NOD2	1	0	0.313433	4	1	0	mRNA
AMN	1	0	0.313433	4	1	0	mRNA
CARD6	1	0	0.313433	4	1	0	mRNA
CDH23	1	0	0.313433	4	1	0	mRNA
SSTR3	1	0	0.313433	4	1	0	mRNA
PRAM1	1	0	0.313433	4	1	0	mRNA
OSM	1	0	0.313433	4	1	0	mRNA
COL8A2	1	0	0.313433	4	1	0	mRNA
LGALS9B	1	0	0.313433	4	1	0	mRNA
CACNA1E	1	0	0.313433	4	1	0	mRNA
BEST1	1	0	0.313433	4	1	0	mRNA
PDE1B	1	0	0.313433	4	1	0	mRNA
TMIGD2	1	0	0.313433	4	1	0	mRNA
CSF3R	1	0	0.313433	4	1	0	mRNA
IQSEC3	1	0	0.313433	4	1	0	mRNA
MICAL1	1	0	0.282316	4	1	0	mRNA
PHGDH	1	0	0.282316	4	1	0	mRNA
PLEKHN1	1	0	0.282316	4	1	0	mRNA
GKAP1	1	0	0.293233	4	1	0	mRNA
HRH2	1	0	0.293233	4	1	0	mRNA
AGBL2	1	0	0.293233	4	1	0	mRNA
CR2	1	0	0.289502	4	1	0	mRNA
FAR2	1	0	0.264791	4	1	0	mRNA
ADA2	1	0	0.262248	4	1	0	mRNA
RAB28	1	0	0.271642	4	1	0	mRNA
APOC1	1	0	0.285266	4	1	0	mRNA
CCDC102B	1	0	0.285266	4	1	0	mRNA
RNASE4	1	0	0.285266	4	1	0	mRNA
LILRB1	1	0	0.280576	4	1	0	mRNA
PLIN5	1	0	0.280576	4	1	0	mRNA
SAT1	1	0	0.302326	4	1	0	mRNA
PTGDR	1	0	0.292605	4	1	0	mRNA
IGSF6	1	0	0.292605	4	1	0	mRNA
ZNF283	1	0	0.292605	4	1	0	mRNA
WDR12	1	0	0.292605	4	1	0	mRNA
AMPD2	1	0	0.292605	4	1	0	mRNA
CR1	1	0	0.292605	4	1	0	mRNA
LILRA1	1	0	0.292605	4	1	0	mRNA
IL17RB	1	0	0.292605	4	1	0	mRNA
QPCT	1	0	0.292605	4	1	0	mRNA
ZNF486	1	0	0.292605	4	1	0	mRNA
ELF5	1	0	0.292605	4	1	0	mRNA
ANKRD34B	1	0	0.292605	4	1	0	mRNA
RFPL2	1	0	0.292605	4	1	0	mRNA
ADAP2	1	0	0.292605	4	1	0	mRNA
SMIM25	1	0	0.293233	4	1	0	lncRNA
AC005076.1	1	0	0.289502	4	1	0	lncRNA
AC093157.1	1	0	0.302326	4	1	0	lncRNA
LINC00910	1	0	0.313433	4	1	0	lncRNA
SATB1-AS1	1	0	0.271642	4	1	0	lncRNA
JPX	1	0	0.280576	4	1	0	lncRNA
DHRS4-AS1	1	0	0.280576	4	1	0	lncRNA
GATA2-AS1	1	0	0.282316	4	1	0	lncRNA
MIR4435-2HG	1	0	0.282316	4	1	0	lncRNA
hsa_circ_0000722	1	0	0.313433	4	1	0	circRNA
hsa_circ_0000274	1	0	0.292605	4	1	0	circRNA
hsa_circ_0008240	1	0	0.313433	4	1	0	circRNA
