# Supplementary material for: Identification of GATA2-AS1- hsa-miR-125b-5p-PLAU ceRNA regulatory network as novel biomarkers for prethrombotic state in patients with coronary artery disease
Source: Research Square preprint supplement (doi:10.21203/rs.3.rs-7671890/v1), 2026-01-29
Supplement: Supplementary file 9 [file c7575d51e326ca6e18b13290.xlsx]

## Sheet: Sheet2
Supplementary Table 1. Scoring criteria for nailfold microcirculation
Index	Grade 1	Score	Grade 2	Score	Grade 3	Score	Grade 4	Score	Grade 5	Score	Grade 6	Score
1. Clarity	Clear	0	Unclear	0.2	Blurred	0.6
2. Capillary number	Increase or decrease <20%	0	−40%	0.8	−60%	2	−80%	4	Absent	6
3. Capillary diameter
— Afferent limb	±<20%	0	±40%	0.2	±60%	0.8	−100% or ≥+100%	1.2
— Efferent limb	±<20%	0	±40%	0.1	±60%	0.4	−100% or ≥+100%	0.8
— Capillary apex	±<20%	0	±40%	0.1	±60%	0.4	−100% or ≥+100%	1
4. Capillary length	±<20%	0	±50%	0.2	±80%	0.4	−100% or ≥+100%	2
5. Capillary morphology
— Crossing	≤30%	0	0.6	0.2	0.8	0.4	1	1.2
— Deformity	≤10%	0	0.3	0.2	0.6	0.4	1	1.2
6. Flow velocity	Linear/linear-granular flow	0	Granular-linear	0.4	Granular	0.8	Slow granular	1.6	Swinging granular	4	Stasis	6
7. Vascular motility	0–1/min	0	2–4/min	0.1	>5/min	0.4
8. RBC aggregation	None	0	Mild	0.2	Moderate	1	Severe	3
9. WBC count	1–30/15s	0	>30/15s	0.2	None	1
10. White microthrombi	None	0	1–2/min	2	>2/min	4.8
11. Color	Light red	0	Pale red	0.2	Dark red	0.4	Dark purple	0.8
12. Exudation	None	0	+	1.5	++	2.4	+++	3.6
13. Hemorrhage	None	0	1–2 capillaries	0.8	3–6 capillaries	2	≥7 capillaries	4.8
14. Subpapillary venous plexus	Absent	0	1 row	0.1	2 rows	0.4	>2 rows, dilated	1
15. Papillae	Wavy	0	Shallow wavy	0.4	Flat	1.6
16. Sweat gland ducts	0–2 per nailfold	0	3–4 per nailfold	0.1	≥5 per nailfold	0.4
