# Supplementary material for: Identification of GATA2-AS1- hsa-miR-125b-5p-PLAU ceRNA regulatory network as novel biomarkers for prethrombotic state in patients with coronary artery disease
Source: Research Square preprint supplement (doi:10.21203/rs.3.rs-7671890/v1), 2026-01-29
Supplement: Supplementary file 10 [file f8b094a0c739f5ee7d708c06.xlsx]

## Sheet: 27DEmiRNA_expression
Supplementary Table 6. 27 candidate miRNAs.
miRNA	NPTSvsHEALTH log2FoldChange	NPTSvsHEALTH pvalue	NPTSvsHEALTH UP DOWN	PTSvsHEALTH log2FoldChange	PTSvsHEALTH pvalue	PTSvsHEALTH UP DOWN	AMIvsHEALTH log2FoldChange	AMIvsHEALTH pvalue	AMIvsHEALTH UP DOWN	PTSvsNPTS log2FoldChange	PTSvsNPTS pvalue	PTSvsNPTS UP DOWN	AMIvsPTS log2FoldChange	AMIvsPTS pvalue	AMIvsPTS UP DOWN
hsa-miR-23b-3p	-0.0189612	0.92995	no	-0.516894	0.0264833	down	-0.360242	0.0492025	down	-0.517095	0.0363875	down	0.164814	0.465113	no
hsa-miR-185-3p	-0.274103	0.367418	no	-0.880716	0.000936207	down	-0.618848	0.0337386	down	-0.623854	0.0210821	down	0.273618	0.277957	no
hsa-miR-125b-5p	-0.36293	0.259244	no	-0.866214	0.00799868	down	-0.660433	0.0363799	down	-0.487432	0.204306	no	0.206594	0.579734	no
hsa-miR-1250-5p	-0.160999	0.531503	no	-0.75563	0.0202174	down	-0.744527	0.0173093	down	-0.617687	0.05475	no	0.0234336	0.950137	no
hsa-miR-99a-5p	-0.29764	0.331083	no	-0.795141	0.0307092	down	-0.802796	0.0209167	down	-0.487227	0.15694	no	-0.00541685	0.988293	no
hsa-miR-7-5p	0.204272	0.549475	no	0.521109	0.00626577	up	0.449837	0.0457298	up	0.321061	0.36342	no	-0.0604478	0.809057	no
hsa-miR-3529-3p	0.202833	0.551593	no	0.519111	0.00654988	up	0.452021	0.0450399	up	0.320474	0.363597	no	-0.0562645	0.822333	no
hsa-miR-576-3p	0.335603	0.0574204	no	0.379702	0.0241822	up	0.519738	0.00389903	up	0.0446462	0.822164	no	0.148515	0.46193	no
hsa-miR-548e-3p	0.517333	0.057208	no	0.584271	0.003218	up	0.537749	0.00632432	up	0.0555221	0.819726	no	-0.0358281	0.808746	no
hsa-miR-21-5p	0.390611	0.0845714	no	0.630984	0.00206504	up	0.570445	0.00307609	up	0.227491	0.270536	no	-0.0490216	0.786211	no
hsa-miR-197-3p	0.352233	0.16018	no	0.709664	0.00316221	up	0.714658	0.00128425	up	0.34444	0.134748	no	0.0110702	0.955667	no
hsa-miR-7706	0.499546	0.0518786	no	0.645146	0.0278569	up	0.760396	0.00874617	up	0.144136	0.584065	no	0.123704	0.673455	no
hsa-miR-1303	-0.180828	0.631357	no	0.733852	0.00880783	up	0.790314	0.012758	up	0.91615	0.00645032	up	0.0616391	0.824611	no
hsa-miR-142-5p	0.331044	0.340838	no	0.625405	0.0326793	up	0.823229	0.00166617	up	0.300624	0.364918	no	0.205009	0.406164	no
hsa-miR-3614-5p	-0.201113	0.60445	no	0.901754	0.01679	up	0.894576	0.0100262	up	1.1006	0.0204148	up	-0.00293506	0.994645	no
hsa-miR-10392-5p	0.152136	0.654433	no	0.799303	0.0349728	up	1.02618	0.00257097	up	0.644749	0.0893518	no	0.237323	0.533597	no
hsa-miR-3909	0.258597	0.428042	no	1.0716	0.00141912	up	1.1724	0.00101391	up	0.819903	0.0180169	up	0.107325	0.77441	no
hsa-miR-760	0.950849	0.0551525	no	0.969573	0.0432591	up	1.25209	0.0221476	up	0.0110975	0.974539	no	0.298736	0.470429	no
hsa-miR-548f-3p	0.0658188	0.878086	no	1.3979	0.00231201	up	1.41176	0.00554279	up	1.33332	0.000867236	up	0.0215564	0.964204	no
hsa-miR-937-3p	0.418727	0.573096	no	1.24736	0.046067	up	1.44878	0.014744	up	0.816293	0.207687	no	0.210434	0.678905	no
hsa-miR-548aq-3p	0.254431	0.653161	no	1.69712	0.00199016	up	1.50738	0.0187264	up	1.43711	0.0048453	up	-0.183661	0.753702	no
hsa-miR-548g-5p	0.254431	0.653161	no	1.69712	0.00199016	up	1.5164	0.0181139	up	1.43711	0.0048453	up	-0.174583	0.765723	no
hsa-miR-1228-3p	-0.0461423	0.950585	no	1.45117	0.0442118	up	1.58476	0.0024303	up	1.49173	0.0592699	no	0.139805	0.814055	no
hsa-miR-147b-5p	0.792243	0.277258	no	1.45459	0.0290642	up	1.65459	0.0301072	up	0.659465	0.265678	no	0.210831	0.732606	no
hsa-miR-582-3p	0.0434988	0.875845	no	1.23592	0.00034409	up	1.68619	4.26848e-06	up	1.19135	0.000979662	up	0.454835	0.283599	no
hsa-miR-4741	1.33833	0.221612	no	2.37881	0.00683073	up	1.88816	0.0411824	up	1.02754	0.164847	no	-0.477459	0.456184	no
hsa-miR-2115-3p	1.00655	0.130584	no	1.47185	0.0356107	up	1.93972	0.00228583	up	0.454219	0.49128	no	0.474465	0.455347	no
